# Supplementary material for: At home e-based physical exercise programs in patients with multiple sclerosis: a scoping review
Source: Frontiers journal article supplement (doi:10.3389/fneur.2024.1449519), 2024-10-15
Supplement: Data_Sheet_1.PDF [file Data_Sheet_1.PDF]

| Type of e-based platform | Author year | Type of exercise                                                                        | Length/frequency | Outcome measurements                                                                                                                              | Outcome (RCTs) - N/A for non-RCTs | Adherence rate | withdrawal     | Funding source/ethics | Adverse events |
|--------------------------|-------------|-----------------------------------------------------------------------------------------|------------------|---------------------------------------------------------------------------------------------------------------------------------------------------|-----------------------------------|----------------|----------------|-----------------------|----------------|
| App                      | Ehling 2017 | Exercises focused on movement, strengthening and coordination of lower limbs and trunk. | 12 weeks / daily | Spasticity 0–10 NRS, MI <sup>1</sup> , SF-36 <sup>2</sup> , HADS <sup>3</sup> , the Würzburg Fatigue Scale. 11-point normative pain rating scale. | N/A                               | 80%            | IG: 1<br>CG: 1 | No funding            | No report      |

|                 |                                                                                                      |                    |                                                                                                                                        |                                                                                                                                                                                                                                                                                                                                           |           |            |           |           |
|-----------------|------------------------------------------------------------------------------------------------------|--------------------|----------------------------------------------------------------------------------------------------------------------------------------|-------------------------------------------------------------------------------------------------------------------------------------------------------------------------------------------------------------------------------------------------------------------------------------------------------------------------------------------|-----------|------------|-----------|-----------|
| Dogan<br>2023   | Home-based exercise program including balance, strengthening, coordination, and stretching exercise. | 8 weeks / 3 weekly | TIS <sup>4</sup> , The kinetic functions sub-parameter of K-ICARS <sup>5</sup> , the ABILHAND, MMDT <sup>6</sup> , MVN Awinda sensors. | Both the virtual reality supported task-oriented circuit therapy group and the mobile application based telerehabilitation group improved improved upper extremity skills, trunk functions and ataxia symptoms. The first-mentioned group was more effective than the latter in improving the dynamic trunk control and kinetic function. | No report | IG: 2      | No report | No report |
| VanBeek<br>2020 | Dexterity exercises.                                                                                 | 4 weeks / 4 weekly | Adherence rate, SUS <sup>7</sup> , a Custom User Engagement Questionnaire, 9HPT <sup>8</sup> .                                         | N/A                                                                                                                                                                                                                                                                                                                                       | 97%       | No reports | No report | No report |

|                 |                      |                       |                                                                                                                                                                                                                                                                                                      |                                                                                                                                                                                                                                                                                                                                                                                                                                                                                           |           |                                |                                                                                           |           |
|-----------------|----------------------|-----------------------|------------------------------------------------------------------------------------------------------------------------------------------------------------------------------------------------------------------------------------------------------------------------------------------------------|-------------------------------------------------------------------------------------------------------------------------------------------------------------------------------------------------------------------------------------------------------------------------------------------------------------------------------------------------------------------------------------------------------------------------------------------------------------------------------------------|-----------|--------------------------------|-------------------------------------------------------------------------------------------|-----------|
| VanBeek<br>2022 | Dexterity exercises. | 4 weeks / 5<br>weekly | AMSQ <sup>9</sup> , the<br>9HPT <sup>8</sup> , CRT <sup>10</sup> , the hand-held<br>JAMAR dynamometer, MSIS-<br>29 <sup>11</sup> .                                                                                                                                                                   | Tablet app-based<br>dexterity training in MS<br>was not superior<br>compared to theraband<br>virtual reality<br>concerning the arm- and<br>hand function from the<br>participant's<br>perspective. However,<br>tablet app-based<br>dexterity training was<br>found to be effective in<br>improving specific<br>dimensions, namely the<br>fine coordinated finger<br>movements and<br>strength. This effect<br>was apparent compared<br>to a control<br>strengthening exercise<br>program. | 92.26%    | TAD-MS:<br>3 Thera-<br>band: 5 | This work was<br>supported by the<br>Swiss Multiple<br>Sclerosis Society<br>and Bayer AG. | No report |
| VanGeel<br>2020 | Walking.             | 10 weeks /<br>unknown | IPAQ <sup>12</sup> , 6MWT <sup>13</sup> , T25FW <sup>14</sup> ,<br>MSWS-12 <sup>15</sup> , 5-STST <sup>16</sup> , 9HPT <sup>8</sup> ,<br>PASAT <sup>17</sup> , SDMT <sup>18</sup> , CFI <sup>19</sup> ,<br>MFIS <sup>20</sup> , FSS <sup>21</sup> , MSIS-29 <sup>11</sup> , SF-<br>36 <sup>2</sup> . | N/A                                                                                                                                                                                                                                                                                                                                                                                                                                                                                       | No report | IG: 3                          | No report                                                                                 | No report |

|          |                 |                                                               |                        |                                                                                                                                                                                                                                                                                                                                                                   |     |                                   |                |                                                                                                                                                                                  |           |
|----------|-----------------|---------------------------------------------------------------|------------------------|-------------------------------------------------------------------------------------------------------------------------------------------------------------------------------------------------------------------------------------------------------------------------------------------------------------------------------------------------------------------|-----|-----------------------------------|----------------|----------------------------------------------------------------------------------------------------------------------------------------------------------------------------------|-----------|
|          | Nasseri<br>2020 | Unknown                                                       | 12 weeks /<br>unknown  | EDSS <sup>22</sup> , 2MWT <sup>23</sup> , 6MWT <sup>13</sup> ,<br>Timed Tandem Walk Test,<br>5TSTST <sup>16</sup> , Multiple Sclerosis<br>Functional Composite,<br>T25FWT <sup>14</sup> , 9HPT <sup>8</sup> , SDMT <sup>18</sup> ,<br>the motor scale of the<br>HAQUAMS <sup>24</sup> , MSWS <sup>25</sup> ,<br>Frenchay activity index,<br>GLTEQ <sup>26</sup> . | N/A | No report                         | CG: 2          | No report                                                                                                                                                                        | No report |
| Webbased | Donkers<br>2020 | Individually<br>prescribed exercises<br>by a physiotherapist. | 6 months / 2<br>weekly | Exercise adherence, MSIS-29 <sup>11</sup> ,<br>HADS <sup>3</sup> , dynamic grip strength<br>and fatigability, T25FWT <sup>14</sup> ,<br>TUG <sup>27</sup> , fall history.                                                                                                                                                                                         | N/A | IG: 38.9(28.1)<br>CG: 34.6( 40.8) | IG: 6<br>CG: 3 | This study was<br>supported by the<br>Hermes Canada  <br>Multiple Sclerosis<br>Society of Canada<br>Wellness<br>Research<br>Innovation Grant;<br>the Saskatoon<br>Health Region; | No report |

and the College of Medicine, University of Saskatchewan.

|                   |                                                                        |                       |                                                                                                                                                                                                                                                                                                                                                       |                                                                                                                                                                                                                                                                                                                                                  |                             |               |                                                                                                    |                                                 |
|-------------------|------------------------------------------------------------------------|-----------------------|-------------------------------------------------------------------------------------------------------------------------------------------------------------------------------------------------------------------------------------------------------------------------------------------------------------------------------------------------------|--------------------------------------------------------------------------------------------------------------------------------------------------------------------------------------------------------------------------------------------------------------------------------------------------------------------------------------------------|-----------------------------|---------------|----------------------------------------------------------------------------------------------------|-------------------------------------------------|
| Flachenecker 2020 | Individual exercise: strength training & endurance training.           | 12 weeks / 1-2 weekly | WEIMuS <sup>28</sup> , MSIS-29 <sup>11</sup> . 2MWT <sup>23</sup> , 10MWT <sup>29</sup> , Tinetti score.                                                                                                                                                                                                                                              | The positive effects of multimodal inpatient rehabilitation on MS-associated fatigue could be maintained with an individually administered, internet-based physical activity and exercise promotion program for 3 months. In parallel with the reduction of fatigue, HRQoL increased, as well as the walking distance in the 2 min walking test. | Per week mean(SD): 1.7(1.7) | IG: 8 CG: 12  | This research was funded in part by the "Freundeskreis Quellenhof e.V.", a nonprofit organization. | No report                                       |
| Paul 2014         | Cardiovascular, strengthening & balance exercises.                     | 12 weeks / 2 weekly   | T25FWT <sup>14</sup> , BBS <sup>30</sup> , TUG <sup>27</sup> , MSIS-29 <sup>11</sup> , Leeds Multiple Sclerosis Quality of Life Scale, Multiple Sclerosis-Related Symptom Checklist, HADS <sup>3</sup> . In addition, to evaluate the feasibility and satisfaction with the webbased physiotherapy programme, participants completed a questionnaire. | N/A                                                                                                                                                                                                                                                                                                                                              | No report                   | CG: 1         | This work was supported by the Chief Scientist Office, Scotland, UK (grant reference CZG/2/528).   | 3 adverse events unrelated to the intervention. |
| Conroy 2018       | Individualized programmes on individual abilities and expressed goals. | 6 months / daily      | T25FWT <sup>14</sup> , 6MWT <sup>13</sup> , BBS <sup>30</sup> , MSWS-12 <sup>15</sup> .                                                                                                                                                                                                                                                               | Significant improvement in MSWS-12 scores were seen in patients that were adherent to the internet-based intervention                                                                                                                                                                                                                            | No report                   | IG: 10 CG: 17 | This work was supported by Merit Review Award I01BX007080 from the US Department of                | No report                                       |

programme. The T25FW and 6MWT scores showed no significant worsening or improvement during the six-month study period.

Veterans Affairs Rehabilitation Research and Development Service. This material is the result of work supported with resources and the use of facilities at the VA Maryland Health Care System, Baltimore, Maryland and Johns Hopkins University School of Medicine, Division of Geriatric Medicine and Gerontology Chronic Disease Informatics government. No funding

|                 |                                                                                            |                      |                                                                                                                                       |     |           |                                           |                                                                                                       |           |
|-----------------|--------------------------------------------------------------------------------------------|----------------------|---------------------------------------------------------------------------------------------------------------------------------------|-----|-----------|-------------------------------------------|-------------------------------------------------------------------------------------------------------|-----------|
| Chapman<br>2020 | Activities focused on active range of motion, strength, balance, or calisthenic movements. | 12 weeks / 3x weekly | T25FWT <sup>14</sup> , 2MWT <sup>23</sup> , MFIS <sup>20</sup> , MSWS-12 <sup>15</sup> , the Short Physical Performance Battery SPPB. | N/A | 58.3%     | No report                                 | No funding                                                                                            | No report |
| Busse<br>2022   | Unknown                                                                                    | 6 months / unknown   | MFIS <sup>20</sup> , UW-SES-SF <sup>31</sup> , OxPAQ <sup>32</sup> , EQ-5D-5L <sup>33</sup> .                                         | N/A | No report | IG: 2 withdrew<br>IG: 3 lost to follow up | This study has been funded by the Multiple Sclerosis Society. The Centre for Trials Research receives | No report |

infrastructure funding from Health and Care Research Wales and Cancer Research UK. HD is supported by the Elizabeth Casson Trust and the NIHR Oxford Health Biomedical Research Centre.

|              |                                                      |                     |                                                                                                                                                                                                                                                                                                                                                                                                                                                                                                 |     |          |                |                                                |                                                     |
|--------------|------------------------------------------------------|---------------------|-------------------------------------------------------------------------------------------------------------------------------------------------------------------------------------------------------------------------------------------------------------------------------------------------------------------------------------------------------------------------------------------------------------------------------------------------------------------------------------------------|-----|----------|----------------|------------------------------------------------|-----------------------------------------------------|
| Paul<br>2019 | Cardiovascular, strengthening and balance exercises. | 6 months / 2 weekly | Adherence, 2MWT <sup>23</sup> , T25FWT <sup>14</sup> , TUG <sup>27</sup> , BBS <sup>30</sup> , MSIS-29 <sup>11</sup> , Multiple Sclerosis–Related Symptom Checklist, HADS <sup>3</sup> , EQ-5D-5L <sup>33</sup> , and steps taken/day measured objectively worn continuously for one week using the activPAL tri-axial accelerometer. To determine the acceptability and feasibility of the study, semi-structured telephone interviews were undertaken with physiotherapists and participants. | N/A | Over 40% | IG: 8<br>CG: 5 | Multiple Sclerosis Society, UK (Grant Ref 11). | 60 adverse events, not related to the intervention. |
|--------------|------------------------------------------------------|---------------------|-------------------------------------------------------------------------------------------------------------------------------------------------------------------------------------------------------------------------------------------------------------------------------------------------------------------------------------------------------------------------------------------------------------------------------------------------------------------------------------------------|-----|----------|----------------|------------------------------------------------|-----------------------------------------------------|

|                      |                                                                                               |                        |                                                                                                                                                                                                                                                                                                                                                                                  |                                                                                                                                                                                                                                                         |                                                                                        |                 |                                                                                                                    |                      |
|----------------------|-----------------------------------------------------------------------------------------------|------------------------|----------------------------------------------------------------------------------------------------------------------------------------------------------------------------------------------------------------------------------------------------------------------------------------------------------------------------------------------------------------------------------|---------------------------------------------------------------------------------------------------------------------------------------------------------------------------------------------------------------------------------------------------------|----------------------------------------------------------------------------------------|-----------------|--------------------------------------------------------------------------------------------------------------------|----------------------|
| Tallner<br>2016      | Strength and<br>endurance training.                                                           | 6 months / 3<br>weekly | Health-related quality of life<br>(HrQoL), muscle strength,<br>aerobic capacity and lung<br>function, physical activity, and<br>fatigue (unknown instruments).                                                                                                                                                                                                                   | The e-training could not<br>influence the primary<br>outcome HrQoL or<br>fatigue, but secondary<br>outcomes, such as<br>muscle strength of the<br>lower extremities, lung<br>function and, especially,<br>physical activity,<br>improved significantly. | 36% of<br>participants<br>documented at<br>least 80% of the<br>prescribed<br>sessions. | IG: 10<br>CG: 8 | No report                                                                                                          | No report            |
| Paul<br>2010         | Individualised<br>exercise programmes.                                                        | 12 weeks / 2<br>weekly | T25FWT <sup>14</sup> , BBS <sup>30</sup> , TUG <sup>27</sup> ,<br>MSIS-29 <sup>11</sup> , Leeds Multiple<br>Sclerosis Quality of Life Scale,<br>Multiple Sclerosis-Related<br>Symptom Checklist, HADS <sup>3</sup> . In<br>addition, to evaluate the<br>feasibility and satisfaction with<br>the webbased physiotherapy<br>programme, participants<br>completed a questionnaire. | N/A                                                                                                                                                                                                                                                     | No report                                                                              | CG: 1           | This work was<br>supported by the<br>Chief Scientist<br>Office, Scotland,<br>UK (grant<br>reference<br>CZG/2/528). | 3 adverse<br>events. |
| Jeong<br>2020        | Unknown                                                                                       | 12 weeks /<br>unknown  | The Pittsburg Sleep Quality<br>Index.                                                                                                                                                                                                                                                                                                                                            | N/A                                                                                                                                                                                                                                                     | No report                                                                              | n/a             | No report                                                                                                          | No report            |
| Finkelste<br>in 2008 | Individualised<br>exercise plan with<br>strengthening,<br>stretching & balance<br>activities. | 12 weeks /<br>unknown  | T25FWT <sup>14</sup> , 6MWT <sup>13</sup> , MSWS-<br>12 <sup>15</sup> , Modified Ashwork Scale,<br>MSQoL-54 <sup>34</sup> , MSSE <sup>35</sup> , Medical<br>Outcome Study Patient<br>Adherence Measure, Client<br>Satisfaction Questionnaire-8,                                                                                                                                  | N/A                                                                                                                                                                                                                                                     | No report                                                                              | n/a             | No report                                                                                                          | No report            |

|                 |                                                                                          |                                                                                 |                                                                                                                                                                                                                                                                                                                        |                                                                                                                                                                                                                                                                                                                                                                                   |                                                                      |                |                                                                                                                                                                                                                                                     |                                                   |
|-----------------|------------------------------------------------------------------------------------------|---------------------------------------------------------------------------------|------------------------------------------------------------------------------------------------------------------------------------------------------------------------------------------------------------------------------------------------------------------------------------------------------------------------|-----------------------------------------------------------------------------------------------------------------------------------------------------------------------------------------------------------------------------------------------------------------------------------------------------------------------------------------------------------------------------------|----------------------------------------------------------------------|----------------|-----------------------------------------------------------------------------------------------------------------------------------------------------------------------------------------------------------------------------------------------------|---------------------------------------------------|
| Coulter<br>2017 | Individualised exercises selected based on their baseline assessment and personal goals. | 12 weeks / 2 weekly                                                             | patient acceptance by use of the attitudinal survey. T25FWT <sup>14</sup> , BBS <sup>30</sup> , TUG <sup>27</sup> , MSIS-29 <sup>11</sup> , Leeds MS Quality of Life Scale, MS-Related Symptom Checklist, HADS <sup>3</sup> . The intervention group also completed a website evaluation questionnaire and interviews. | N/A                                                                                                                                                                                                                                                                                                                                                                               | Participants logged on to the website an average 1.3 times per week. | CG: 1          | This work was supported by the Chief Scientist Office, Scotland [Grant reference CZG/2/528].                                                                                                                                                        | 3 adverse events not related to the intervention. |
| Knox<br>2022    | Exercises for trunk control for independent sitting & transfers.                         | 6.5 months / unknown                                                            | In dept interviews face to face and focus group interviews                                                                                                                                                                                                                                                             | N/A                                                                                                                                                                                                                                                                                                                                                                               | No report                                                            | 17             | The Saskatchewan Centre for Patient-Oriented Research. The original trial was funded by a Hermes Canada Multiple Sclerosis Society of Canada Research Innovation Grant.                                                                             | No report                                         |
| Pilutti<br>2013 | Lifestyle physical activity, primarily walking.                                          | New content 4 times during the first 8 weeks, 2 times during the final 8 weeks. | GLTEQ <sup>26</sup> , ActiGraph accelerometers, FSS <sup>27</sup> , MFIS <sup>20</sup> , HADS <sup>3</sup> , The 15-item short-form McGill Pain Questionnaire, The Pittsburgh Sleep Quality Index, MSIS-29 <sup>11</sup> , The Patient-Determined Disease Steps.                                                       | The study confirms that a lifestyle intervention delivered through the Internet can be effective for increasing everyday physical activity in persons with MS. The intervention group reported significantly less depression, anxiety, and severity of fatigue compared with controls post-trial. The effect for fatigue severity was large in magnitude, whereas the effects for | No report                                                            | IG: 4<br>CG: 2 | This work was supported, in part, by a grant from the National Multiple Sclerosis Society [PP1695]. LAP was the recipient of a Postdoctoral Fellowship from the Multiple Sclerosis Society of Canada and a Du Pré Grant from the Multiple Sclerosis | No report                                         |

|                 |                |                                       |                                                           |                                                                                                                                                                                                                                                                                                                                                                                                                                                                                                                                                                          |                                                                                                                                                                                                                                                                                                                                                                                                                                                |                     |                |                                                                                                                                                                       |           |
|-----------------|----------------|---------------------------------------|-----------------------------------------------------------|--------------------------------------------------------------------------------------------------------------------------------------------------------------------------------------------------------------------------------------------------------------------------------------------------------------------------------------------------------------------------------------------------------------------------------------------------------------------------------------------------------------------------------------------------------------------------|------------------------------------------------------------------------------------------------------------------------------------------------------------------------------------------------------------------------------------------------------------------------------------------------------------------------------------------------------------------------------------------------------------------------------------------------|---------------------|----------------|-----------------------------------------------------------------------------------------------------------------------------------------------------------------------|-----------|
|                 |                |                                       |                                                           |                                                                                                                                                                                                                                                                                                                                                                                                                                                                                                                                                                          | depression and anxiety symptoms were moderate. The lifestyle physical activity intervention had a moderate effect on pain and sleep quality, although these changes did not reach statistical significance.                                                                                                                                                                                                                                    |                     |                | International Federation.                                                                                                                                             |           |
| Virtual reality | Dennett 2020   | Individualized exercise programme.    | 6 month / 2 weekly                                        | In dept interviews face to face.                                                                                                                                                                                                                                                                                                                                                                                                                                                                                                                                         | N/A                                                                                                                                                                                                                                                                                                                                                                                                                                            | No report           | 1              | No report                                                                                                                                                             | No report |
|                 | Gutierrez 2013 | Postural control and balance training | 10 weeks IG: 4 weekly / unknown<br>CG: 2 weekly / unknown | BBS <sup>30</sup> , Tinetti scale.                                                                                                                                                                                                                                                                                                                                                                                                                                                                                                                                       | N/A                                                                                                                                                                                                                                                                                                                                                                                                                                            | No report           | IG: 1<br>CG: 2 | No report                                                                                                                                                             | No report |
|                 | Pagliari 2021  | Unknown                               | 6 weeks / 5 weekly                                        | MSQoL-54 <sup>34</sup> , MSWS-12 <sup>15</sup> , BDI <sup>36</sup> , FSS <sup>21</sup> , Regulatory Emotional Self-Efficacy, State-Trait Anxiety, Box and Block Test, Mini-Balance Evaluation System Test, 9HPT <sup>8</sup> , Montreal Cognitive Assessment, SDMT <sup>18</sup> , Selective Reminding Test-Long Term Storage, Selective Reminding Test Consistent Long-Term Tetrieval, 10/36 Spatial Recall Test, Paced Auditory Serial Addition Test at 3s, Selective Reminding Test-Delayed Recall, D-10/36-Spatial Recall Test-Delayed Recall, Word List Generation. | Our data support high technological usability as reported by patients, with the majority of participants' evaluations from excellent to best imaginable usability, demonstrating that virtual reality is a relatively suitable telerehabilitation solution. Higher adherence registered in the experimental group. Improving the perception of well-being and self-health can favourably impact pwMS. Beneficial effect observed on mood, with | IG: 86.7% CG: 80.0% | 10 in total    | This work was supported by the Italian Ministry of Health (Ricerca Corrente and Rete IRCCS Delle Neuroscienze e Della Neuroriabilitazione – Teleneuroriabilitazione). | No report |

|                   |               |                               |                   |                                                                                                                                                                                                                                |                                                                                                                                                                                                                                                                                                                                                                                                                                                                                                                                                                                                     |           |                 |                                                           |           |  |
|-------------------|---------------|-------------------------------|-------------------|--------------------------------------------------------------------------------------------------------------------------------------------------------------------------------------------------------------------------------|-----------------------------------------------------------------------------------------------------------------------------------------------------------------------------------------------------------------------------------------------------------------------------------------------------------------------------------------------------------------------------------------------------------------------------------------------------------------------------------------------------------------------------------------------------------------------------------------------------|-----------|-----------------|-----------------------------------------------------------|-----------|--|
|                   |               |                               |                   |                                                                                                                                                                                                                                | <p>a general reduction of depressive symptoms reported by participants of both groups at post-treatment.</p> <p>Improvements in motor performances associated with balance, postural control, and walking. In total, 63.3% of the telerehabilitation group exhibited improvement in the physical domain of the quality of life. The telerehabilitation group showed greater improvement than the usual care group in Mini-BESTest domains of balance, postural control, and dynamic walking at post-treatment. Higher adherence was registered for telerehabilitation compared with usual care.</p> |           |                 |                                                           |           |  |
|                   | Kamm 2023     | Dexterity exercises.          | 2 weeks / unknown | Feasibility was measured by the adherence to the protocol, SUS <sup>7</sup> , the Custom User Engagement Questionnaire. 9HPT <sup>8</sup> , CRT <sup>10</sup> , JAMAR dynamometer, AMSQ <sup>9</sup> , MSIS-29 <sup>11</sup> . | N/A                                                                                                                                                                                                                                                                                                                                                                                                                                                                                                                                                                                                 | 81.8%     | no drop-outs    | This work was financed by an unrestricted Grant by Roche. | No report |  |
| Videoconferencing | Kahraman 2020 | Motor imagery training (MIT). | 8 weeks / 2weekly | Dynamic Gait Index, T25FW <sup>14</sup> , 2MWT <sup>23</sup> , TUG <sup>27</sup> , the Activities-specific Balance                                                                                                             | The telerehabilitation-based imaging training program was feasible                                                                                                                                                                                                                                                                                                                                                                                                                                                                                                                                  | No report | IG: 5<br>CG: 10 | No report                                                 | No report |  |

|                |         |                    |                                                                                                                                                                                                                                                                                                                                                                |                                                                                                                                                                                                             |           |             |           |           |
|----------------|---------|--------------------|----------------------------------------------------------------------------------------------------------------------------------------------------------------------------------------------------------------------------------------------------------------------------------------------------------------------------------------------------------------|-------------------------------------------------------------------------------------------------------------------------------------------------------------------------------------------------------------|-----------|-------------|-----------|-----------|
|                |         |                    | Confidence ABC Scale, a computerized posturography device, postural Stability Test , Limits of Stability Test, the Balance System™ SD.                                                                                                                                                                                                                         | and effective in improving dynamic balance during walking, walking speed and perceived walking ability, balance confidence, cognitive functions, fatigue, anxiety, depression, and quality of life in pwMS. |           |             |           |           |
| Fjeldstad 2016 | Unknown | 8 weeks / 2 weekly | Functional gait assessment, T25FWT <sup>14</sup> , walk across quantifies characteristics of gait as the patient walks across the length of the force plate using the Neurocom Smart Balance Master, BBS <sup>30</sup> , SF-36 <sup>2</sup> , MFIS <sup>20</sup> , MSSE <sup>35</sup> , EDSS <sup>22</sup> , the Activities-Specific Balance Confidence Scale. | N/A                                                                                                                                                                                                         | No report | Pt group: 1 | No report | No report |

|                             |                                                             |                                                       |                                                                                                                                                                                                              |                                                                                                                                                                                                                                                         |                                                                                                       |                                   |                                                                                                                                                                                                              |           |
|-----------------------------|-------------------------------------------------------------|-------------------------------------------------------|--------------------------------------------------------------------------------------------------------------------------------------------------------------------------------------------------------------|---------------------------------------------------------------------------------------------------------------------------------------------------------------------------------------------------------------------------------------------------------|-------------------------------------------------------------------------------------------------------|-----------------------------------|--------------------------------------------------------------------------------------------------------------------------------------------------------------------------------------------------------------|-----------|
| Sebastiao<br>2018           | Unknown                                                     | 12 weeks / 2<br>weekly –<br>progressed to 5<br>weekly | T25FW <sup>14</sup> , 6MWT <sup>13</sup> , TUG <sup>27</sup> ,<br>SDMT <sup>18</sup> , Brief Visuospatial<br>Memory Test, the California<br>Verbal Learning Test, the Short<br>Physical Performance Battery. | N/A                                                                                                                                                                                                                                                     | Seven (47%)<br>missed at least<br>one of the<br>biweekly<br>meetings with<br>the exercise<br>trainer. | 1 from ig<br>lost to<br>follow-up | This study was<br>supported in part<br>by a pilot grant<br>from the<br>Consortium of<br>Multiple Sclerosis<br>Centers (2016-<br>084666).                                                                     |           |
| Tarakci<br>2021             | Stretching,<br>strengthening,<br>balance &<br>coordination. | 12 weeks / 3<br>weekly                                | The Functional Independence<br>Measure, the Nottingham<br>Health Profile, FSS <sup>21</sup> , and<br>Quality of Life Scale.                                                                                  | Both approaches led to<br>significant<br>improvements after the<br>intervention.<br>Improvements in the<br>FSS and total score in<br>the NHP were found to<br>be more significant<br>between groups in favor<br>of the supervised<br>exercise approach. | No report                                                                                             | 0                                 | The First Author,<br>Ela Tarakci was<br>awarded and<br>received<br>individual funding<br>from Turkish<br>Academy of<br>Sciences as the<br>winner of the<br>Young Scientists<br>Award Program<br>(GEBIP) 2018 | No report |
| Ortiz-<br>Gutierrez<br>2013 | Integrating<br>proprioceptive, visual                       | 10 weeks / 4<br>weekly                                | Composite Equilibrium Score,<br>Visual Preference Ratio,                                                                                                                                                     | N/A                                                                                                                                                                                                                                                     | No report                                                                                             | IG: 1<br>CG: 2                    | No report                                                                                                                                                                                                    | No report |

|        |               |                                   |                       |                                                                                                                                                                |                                                                                                                                                                                                                                                                                                                                                   |                      |                |           |           |
|--------|---------------|-----------------------------------|-----------------------|----------------------------------------------------------------------------------------------------------------------------------------------------------------|---------------------------------------------------------------------------------------------------------------------------------------------------------------------------------------------------------------------------------------------------------------------------------------------------------------------------------------------------|----------------------|----------------|-----------|-----------|
|        |               | & vestibular sensory information. |                       | Vestibular Ratio, Visual Ratio, Somatosensory Ratio.                                                                                                           |                                                                                                                                                                                                                                                                                                                                                   |                      |                |           |           |
| E-mail | Keytsman 2019 | Bicycling.                        | 6 months / 3weekly    | Weight, BMI, fat mass, fat percentage, total fat, VO2 max, workload, heart rate max, heart rate recovery, lactat max, lactat peak, respiratory exchange ratio. | N/A                                                                                                                                                                                                                                                                                                                                               | IG: ~95%<br>HC: ~90% | IG: 5 HC: 3    | No report | No report |
|        | Kratz 2014    | Unknown                           | 12 weeks / 8 sessions | The 7-Day Physical Activity Recall Interview, HAM-D <sup>37</sup> , The Positive and Negative Affect Schedule.                                                 | Motivational interviewing intervention was related to decreased depressive symptoms by way of changes in a number of specific mechanistic pathways. The intervention results in increased physical activity compared with the waitlist control. Physical activity was related to increased positive affect, related to lower depressive symptoms. | No report            | IG: 2<br>CG: 9 | No report | No report |

|                 |                                                                           |                                                               |                                                                                                                                                                                                                                                                                                                                                  |                                                                                                                                                                                                                 |                                                         |                 |                                                                                                                                                                                    |           |
|-----------------|---------------------------------------------------------------------------|---------------------------------------------------------------|--------------------------------------------------------------------------------------------------------------------------------------------------------------------------------------------------------------------------------------------------------------------------------------------------------------------------------------------------|-----------------------------------------------------------------------------------------------------------------------------------------------------------------------------------------------------------------|---------------------------------------------------------|-----------------|------------------------------------------------------------------------------------------------------------------------------------------------------------------------------------|-----------|
| Abasiyanik 2018 | Pilates.                                                                  | Once a week for 8 weeks plus a two-day home exercise program. | 6MWT <sup>13</sup> , T25FWT <sup>14</sup> , TUG <sup>27</sup> , MSWS-12 <sup>15</sup> , The Biodex Balance System, The Falls Efficacy Scale International, The Activities-Specific Balance Confidence Scale, The Curl-Up Test, Maximum inspiratory and expiratory pressure, The Brief International Cognitive Assessment for Multiple Sclerosis. | Our results demonstrated that an 8-week Clinical Pilates training program can improve walking, balance, respiratory functions, and cognitive functions and decrease fall risk in pwMS.                          | No report                                               | IG: 5<br>CG: 4  | The Multiple Sclerosis Research Association funded this study in terms of purchasing the manovacuometer (Medical Electronic Construction, Pocket-Spiro MPM100, Brussels, Belgium). | No report |
| Bombardier 2013 | Unknown                                                                   | 12 weeks / unknown                                            | HAM-D <sup>37</sup> .                                                                                                                                                                                                                                                                                                                            | The treatment group evidenced significantly lower depression severity. Physical activity increased significantly more in the treatment condition, though it did not mediate improvement in depression severity. | No report                                               | IG: 22<br>CG: 9 | No report                                                                                                                                                                          | No report |
| Kratz 2020      | Cycling, treadmill overground walking, lower extremity strength training. | 8 weeks / 3 weekly                                            | Feasibility, acceptability, Ecological Momentary Assessment Fatigue Intensity and Fatigue Interference, FSS <sup>21</sup> .                                                                                                                                                                                                                      | N/A                                                                                                                                                                                                             | IG: 7.6 sessions out of 8.<br>CG: 7.8 sessions out of 8 | IG: 1           | No report                                                                                                                                                                          |           |

|                |         |                                                                                                                                              |                                                                                         |                                                                                                                                                                                                                                                                                                                                                                                                                                                           |           |       |           |                       |
|----------------|---------|----------------------------------------------------------------------------------------------------------------------------------------------|-----------------------------------------------------------------------------------------|-----------------------------------------------------------------------------------------------------------------------------------------------------------------------------------------------------------------------------------------------------------------------------------------------------------------------------------------------------------------------------------------------------------------------------------------------------------|-----------|-------|-----------|-----------------------|
| Turner<br>2016 | Unknown | 6 months<br>7 times during<br>the first 2<br>months, 4 times<br>during the<br>second 2<br>months, and<br>twice during the<br>final 2 months. | The Depression Module of the<br>Patient Health Questionnaire-9,<br>MFIS <sup>20</sup> . | Brief telephone<br>counseling and<br>telehealth home<br>monitoring to promote<br>physical activity (TC)<br>can improve fatigue<br>among individuals with<br>MS compared to self-<br>directed education (EC).<br>By 6-month follow-up,<br>participants in the TC<br>condition experienced<br>significant reductions in<br>fatigue<br>relative to individuals in<br>EC. For 33.3% of<br>participants in TC, this<br>reduction was clinically<br>significant | No report | IG: 1 | No report | No adverse<br>events. |
|----------------|---------|----------------------------------------------------------------------------------------------------------------------------------------------|-----------------------------------------------------------------------------------------|-----------------------------------------------------------------------------------------------------------------------------------------------------------------------------------------------------------------------------------------------------------------------------------------------------------------------------------------------------------------------------------------------------------------------------------------------------------|-----------|-------|-----------|-----------------------|

|             |                               |                                                                                           |                    |                                                                                                                                                                                                            |                                                                                                                                                                                                                                                                                                                                                                                                                                                               |                                                       |              |           |           |
|-------------|-------------------------------|-------------------------------------------------------------------------------------------|--------------------|------------------------------------------------------------------------------------------------------------------------------------------------------------------------------------------------------------|---------------------------------------------------------------------------------------------------------------------------------------------------------------------------------------------------------------------------------------------------------------------------------------------------------------------------------------------------------------------------------------------------------------------------------------------------------------|-------------------------------------------------------|--------------|-----------|-----------|
| Combination | Dlugonski 2012                | Unknown                                                                                   | 12 weeks / unknown | GLTEQ <sup>26</sup> , MSWS-12 <sup>25</sup> , MSIS-29 <sup>11</sup> , PDDS <sup>38</sup> , process evaluation questionnaire.                                                                               | An Internet-delivered behavioral intervention for persons with MS resulted in a large increase in physical activity that was sustained following the intervention, larger for the intervention group. Non-significant condition-by-time interactions for walking mobility and HRQOL. No significant correlations between change in physical activity and HRQOL or walking mobility change from pre- to post-trial within the intervention and control groups. | 77%                                                   | 11           | No report | No report |
|             | Mardaniyan Ghahfarr okhi 2021 | Range of motion, balance exercises, posture exercises, strength exercises, pelvic control | 8 weeks / 3 weekly | Age, height, weight, body mass index, fat mass, lean mass, EDSS <sup>22</sup> , MS duration, SDMT <sup>18</sup> , 10MWT <sup>29</sup> , T25FWT <sup>14</sup> , TUG <sup>27</sup> , the Six Spot Step Test, | N/A                                                                                                                                                                                                                                                                                                                                                                                                                                                           | First 4 weeks HBNFT group: 92.2%<br>HBRT group: 91.1% | no drop-outs | No report | No report |

|               |                                |                    |                                                                                     |                                                                                                                                                                                                                                                                                                                                 |                                                             |                |           |           |
|---------------|--------------------------------|--------------------|-------------------------------------------------------------------------------------|---------------------------------------------------------------------------------------------------------------------------------------------------------------------------------------------------------------------------------------------------------------------------------------------------------------------------------|-------------------------------------------------------------|----------------|-----------|-----------|
|               | exercises and torso stability. |                    | 6MWT <sup>13</sup> , 5TSTS <sup>16</sup> , self-reported feasibility questionnaire. |                                                                                                                                                                                                                                                                                                                                 | Second 4 weeks:<br>HBNFT group: 96.7%<br>HBRT group: 95.6%. |                |           |           |
| Sandroff 2014 | Unknown                        | 6 months / unknown | SDMT <sup>18</sup> , 6MWT <sup>13</sup> , IPAQ <sup>12</sup> , PDDS <sup>38</sup> . | SDMT scores increased in the intervention condition as a function of disability. 6MW distance increased in the intervention condition, and this did not occur as a function of disability. Greater increases in physical activity were associated with faster CPS and better walking performance in the intervention condition. | IG: 88.6 %                                                  | IG: 4<br>CG: 2 | No report | No report |

|                               |              |                                                                        |                    |                                                                                                                                                                        |                                                                                                                                                                                                                                                                                                                                                                                                                                                                                                                                                                                                         |           |       |                                                                                                     |           |
|-------------------------------|--------------|------------------------------------------------------------------------|--------------------|------------------------------------------------------------------------------------------------------------------------------------------------------------------------|---------------------------------------------------------------------------------------------------------------------------------------------------------------------------------------------------------------------------------------------------------------------------------------------------------------------------------------------------------------------------------------------------------------------------------------------------------------------------------------------------------------------------------------------------------------------------------------------------------|-----------|-------|-----------------------------------------------------------------------------------------------------|-----------|
| Videoconferencing & telephone | Plow 2022    | Pedometer-based walking programme as well as another unknown training. | 12 weeks / unknown | FIS <sup>39</sup> , GLTEQ <sup>26</sup> , MSIS-29 <sup>11</sup> , The Energy Conservation Strategy Survey.                                                             | No interaction terms were statistically significant in the moderation analysis. However, the responder analysis showed that baseline psychosocial characteristics and mental function were significantly different ( $p < 0.05$ ) between responders and non-responders. Specifically, non-responders on the FIS at post-test in the PA-only intervention had significantly lower baseline scores in goal setting for engaging in fatigue self-management behaviours. Also, nonresponders on the GLTEQ at post-test in the FM+ intervention had significantly worse baseline scores in mental function. | No report | n/a   | This work was supported through the National Multiple Sclerosis Society (NMSS, Grant # RG4665-A-1). | No report |
| DVD & telephone               | Fleming 2019 | Pilates.                                                               | 8 weeks / 2 weekly | MFIS <sup>20</sup> , Profile of Mood States Brief Form, The State Trait Anxiety Inventory, HADS <sup>3</sup> , Quick Inventory of Depressive Symptomatology, Seven-day | N/A                                                                                                                                                                                                                                                                                                                                                                                                                                                                                                                                                                                                     | No report | IG: 2 | No report                                                                                           | No report |

|                                                                                     |              |                                                                                                                                                                                |                                        |                                                                                                                                                                                      |                                                                                                                                                                                                                                                 |                                          |                |           |                                                                                           |
|-------------------------------------------------------------------------------------|--------------|--------------------------------------------------------------------------------------------------------------------------------------------------------------------------------|----------------------------------------|--------------------------------------------------------------------------------------------------------------------------------------------------------------------------------------|-------------------------------------------------------------------------------------------------------------------------------------------------------------------------------------------------------------------------------------------------|------------------------------------------|----------------|-----------|-------------------------------------------------------------------------------------------|
| Videoconferencing or phone & newsletter & fitbit one (to measure physical activity) | Manns 2020   | Weekly coaching sessions encouraged breaking up prolonged sitting bouts (focus of the SitLess stage) or promoting increased steps per day in addition to interrupting sitting. | 15 weeks / unknown                     | Physical Activity Recall Scale, GLTEQ <sup>26</sup> .<br>ActivPAL3.                                                                                                                  | N/A                                                                                                                                                                                                                                             | No report                                | 5              | No report | 15 adverse events in 10 participant regarding falls not associated with the intervention. |
| Google meet & Zoom & Instagram                                                      | Najafi 2023  | Yoga & pilates.                                                                                                                                                                | 8 weeks / 3 weekly                     | Cortisol- and prolactin serum levels, MSQoL-54 <sup>34</sup> , General Health Questionnaire, IPAQ <sup>12</sup> , IBD <sup>36</sup> , T25FW <sup>14</sup> , MSQoL-54 <sup>34</sup> . | The investigation results after eight weeks of tele-Pilates and tele-yoga in females with MS showed an increase in prolactin serum levels; improvements in depression; and the enhancement of physical activity levels, walking speed, and QoL. | Tele-pilates: 5<br>Tele-yoga: 4<br>CG: 2 | n/a            | No report | No report                                                                                 |
| Website & Yamax SW-401                                                              | Pilutti 2014 | Lifestyle physical activity, primarily walking.                                                                                                                                | 6 months<br>7 times during the first 2 | PDDS <sup>38</sup> , BMI, Whole-body bone mineral content, bone mineral density and soft tissue                                                                                      | We provide preliminary evidence that an internet-delivered life-                                                                                                                                                                                | No report                                | IG: 6<br>CG: 4 | No report | No report                                                                                 |

Digiwalker  
pedometer  
& Goal  
Tracker &  
Skype

months, 4 times  
during the  
second 2  
months, and  
twice during the  
final 2 months.

composition, GLTEQ<sup>26</sup>,  
ActiGraph model GT3X  
accelerometers.

style physical activity  
intervention might  
improve bone health  
and body composition,  
assessed using criterion  
standard measurement,  
in persons with MS.

|                                                                                                         |                |                                  |                                                                |                                                                                                                                                                                                           |                                                                                                             |      |                      |           |           |
|---------------------------------------------------------------------------------------------------------|----------------|----------------------------------|----------------------------------------------------------------|-----------------------------------------------------------------------------------------------------------------------------------------------------------------------------------------------------------|-------------------------------------------------------------------------------------------------------------|------|----------------------|-----------|-----------|
| DVD & programme manual & calendars & logbook & behavioural change interaction & videochats & newsletter | Learmonth 2016 | Resistance and aerobic training. | 16 weeks / 2 weekly                                            | Feasibility was assessed in the domains of process (e.g., recruitment), resource (e.g., monetary costs), management (e.g., personnel time requirements) and scientific outcomes (e.g., treatment effect). | N/A                                                                                                         | 90%  | 4 from IG, 2 from CG | No report | No report |
| Telephone & teleconferencing                                                                            | Plow 2019      | Walking.                         | PA group: 3 teleconference sessions followed by 4 individually | FIS39, GLTEQ <sup>26</sup> , Accelerometers (ActiGraph triaxis accelerometers), MSIS-29 <sup>11</sup> , treatment fidelity and possible confounders (tracking                                             | Group teleconferences followed by tailored phone calls have a small yet statistically significant effect in | >95% | n/a                  | No report | No report |

|                                 |              |                                  |                                                                                                                                           |                                                               |                                                                                                                                                                                                                                                                                                                                            |           |                |           |           |
|---------------------------------|--------------|----------------------------------|-------------------------------------------------------------------------------------------------------------------------------------------|---------------------------------------------------------------|--------------------------------------------------------------------------------------------------------------------------------------------------------------------------------------------------------------------------------------------------------------------------------------------------------------------------------------------|-----------|----------------|-----------|-----------|
| Other                           |              |                                  | tailored phone calls. The FM+ and CC groups consisted of 6 group teleconference sessions followed by 4 individually tailored phone calls. | attendance and monitoring the delivery of the interventions). | promoting physical activity and reducing fatigue impact in people with MS.                                                                                                                                                                                                                                                                 |           |                |           |           |
|                                 |              |                                  |                                                                                                                                           |                                                               |                                                                                                                                                                                                                                                                                                                                            |           |                |           |           |
| Home-care activity desk (H-CAD) | Huijgen 2008 | Upper limb functional exercises. | 4 weeks / 5 weekly                                                                                                                        | The Action Research Arm Test, 9HPT <sup>8</sup> .             | Based on the high satisfaction of both patients and therapists, together with the finding that the HCAD training is as feasible as usual care when comparing their clinical outcomes, the HCAD intervention might be valuable as treatment in future care for stroke, TBI and MS patients living at home to train their arm/hand function. | No report | IG: 7<br>CG: 4 | No report | No report |

|                                     |            |                           |                    |                          |                                                                                                                                                                                                                                                                                                                                                                                                                                                                                                                                                                                                                                                                                                                                                                                     |           |     |           |           |
|-------------------------------------|------------|---------------------------|--------------------|--------------------------|-------------------------------------------------------------------------------------------------------------------------------------------------------------------------------------------------------------------------------------------------------------------------------------------------------------------------------------------------------------------------------------------------------------------------------------------------------------------------------------------------------------------------------------------------------------------------------------------------------------------------------------------------------------------------------------------------------------------------------------------------------------------------------------|-----------|-----|-----------|-----------|
| Home Automated Telemanagement (HAT) | Jeong 2021 | Individualised exercises. | 12 weeks / unknown | MSQOL-54 <sup>34</sup> . | Physical telerehabilitation in the intervention group resulted in more prominent improvements in QOL and symptom reduction as compared to a usual care control group. More than 70% of the patients in the intervention group showed improvements in sub-scales reflecting physical health, role limitations emotional, health perceptions, cognitive function, change in health and satisfaction with sexual function, and more than 60% of these patients improved in scores of role limitations-physical, social function, health distress, sexual function, and overall quality of life. In particular, the use of the physical telerehabilitation system showed statistical differences in major MS symptoms including pain and cognitive function with significant changes in | No report | n/a | No report | No report |
|-------------------------------------|------------|---------------------------|--------------------|--------------------------|-------------------------------------------------------------------------------------------------------------------------------------------------------------------------------------------------------------------------------------------------------------------------------------------------------------------------------------------------------------------------------------------------------------------------------------------------------------------------------------------------------------------------------------------------------------------------------------------------------------------------------------------------------------------------------------------------------------------------------------------------------------------------------------|-----------|-----|-----------|-----------|

the corresponding sub-  
scale scores (pain:  
27.3%, cognitive  
function: 35.3%).

|                 |                     |                    |                                                                           |                                                                                                                                                                                       |     |           |               |           |                      |
|-----------------|---------------------|--------------------|---------------------------------------------------------------------------|---------------------------------------------------------------------------------------------------------------------------------------------------------------------------------------|-----|-----------|---------------|-----------|----------------------|
| Nintendo<br>Wii | Prosperin<br>i 2012 | Balance exercises. | 12 weeks<br>intervention, 12<br>weeks<br>observation / 5<br>times weekly. | Force platform–based measures<br>of static standing balance, the<br>4-Step Square Test, T25FWT <sup>14</sup> ,<br>MSIS-29 <sup>11</sup> . Self-reported<br>number of accidental falls | N/A | No report | IG: 1<br>CG:1 | No report | 5 adverse<br>events. |
|-----------------|---------------------|--------------------|---------------------------------------------------------------------------|---------------------------------------------------------------------------------------------------------------------------------------------------------------------------------------|-----|-----------|---------------|-----------|----------------------|

|                  |                 |                                                 |                                                                                          |                                                                                                                                                                                                                                                                                                                                                                                                                               |     |  |                                                                                                          |                |                                                                                                                                                                                                                       |           |
|------------------|-----------------|-------------------------------------------------|------------------------------------------------------------------------------------------|-------------------------------------------------------------------------------------------------------------------------------------------------------------------------------------------------------------------------------------------------------------------------------------------------------------------------------------------------------------------------------------------------------------------------------|-----|--|----------------------------------------------------------------------------------------------------------|----------------|-----------------------------------------------------------------------------------------------------------------------------------------------------------------------------------------------------------------------|-----------|
|                  |                 |                                                 |                                                                                          | (defined as an unexpected contact of any part of the body with the ground) that occurred in the 12-week period before randomization was also asked of each patient. Force platform-based measures of static standing balance were collected with a monoaxial force platform.                                                                                                                                                  |     |  |                                                                                                          |                |                                                                                                                                                                                                                       |           |
| Nintendo Wii     | Thomas 2017     | Unknown                                         | 12 months for the immediate group and for about 6 months for the delayed group.          | GLTEQ <sup>26</sup> , activPAL3 triaxial accelerometer, HADS <sup>3</sup> , EQ-5D-5L <sup>33</sup> , MSIS-29 <sup>11</sup> , the Fatigue Symptom Inventory, SF-36 <sup>2</sup> , the Spinal Cord Injury Exercise Self-Efficacy Scale, MSSE <sup>35</sup> , 2MWT <sup>23</sup> , Step Test, Steady Stance Test, the Instrumented Timed Up and Go Test, Gait Stride-time Rhythmicity, Static Posturography, 9HPT <sup>8</sup> . | N/A |  | The Wii was used on around 30% of days during the first 6 months and 19% of days in the second 6 months, | IG: 2          | This study was funded by a project grant awarded by the MS Society in the UK (ref no. 933/10). It is included in the National Institute of Health Research Clinical Research Network (NIHR CRN) portfolio (ID 13130). | No report |
| Nintendo Wii     | Prosperini 2014 | Balance exercises.                              | 12 weeks / 5 weekly                                                                      | Static posturography, brain MRI scan.                                                                                                                                                                                                                                                                                                                                                                                         | N/A |  | No report                                                                                                | IG: 5<br>CG: 4 | no report                                                                                                                                                                                                             | No report |
| Preloaded tablet | Kim 2022        | Yoga, pilates & neurorehabilitation activities. | First 8 weeks: 60 min 2 times weekly<br>next 4 weeks: only yoga and pilates once a week. | Unknown                                                                                                                                                                                                                                                                                                                                                                                                                       | N/A |  | No report                                                                                                | N/A            | The work of this article was supported by the Patient-Centered Outcomes Research Institute (PCORI), United                                                                                                            | No report |

|                                 |              |                                                                                                                          |                                      |                                                                                                                         |                                                                                                  |           |                |                                                                                                                                                                               |                                                                                                                                                                               |
|---------------------------------|--------------|--------------------------------------------------------------------------------------------------------------------------|--------------------------------------|-------------------------------------------------------------------------------------------------------------------------|--------------------------------------------------------------------------------------------------|-----------|----------------|-------------------------------------------------------------------------------------------------------------------------------------------------------------------------------|-------------------------------------------------------------------------------------------------------------------------------------------------------------------------------|
| Home-care activity desk (H-CAD) | Hermens 2008 | Exercises of the upper limb for reaching, grasping, lateral pinch, pinch grip, holding, manipulation & finger dexterity. | 4 weeks / 3 min / day / 5 days /week | The Action Research Arm Test, the Wolf Motor Function Test, the Barthel Index, 9HPT <sup>8</sup> , SF-36 <sup>2</sup> . | In general, we can conclude that the arm/hand function remained at the same level in both groups | No report | IG: 9<br>CG: 6 | States (Award #MS-1511-33653).<br>No report                                                                                                                                   | No report                                                                                                                                                                     |
| Nintendo Wii                    | Plow 2014    | Unknown                                                                                                                  | 14 weeks / unknown                   | Unknown                                                                                                                 | N/A                                                                                              | No report | n/a            | this study was supported by a grant from the consortium of multiple sclerosis centers (CMSC) and the national multiple sclerosis society (NMSS) post-doctoral training grant. | No report                                                                                                                                                                     |
| Nintendo Wii                    | Plow 2011    | Unknown                                                                                                                  | 14 weeks / unknown                   | Unknown                                                                                                                 | N/A                                                                                              |           | n/a            | No report                                                                                                                                                                     | This study was supported by a grant from the consortium of multiple sclerosis centers (CMSC) and the national multiple sclerosis society (NMSS) post-doctoral training grant. |

<sup>1</sup> Motricity Index

<sup>2</sup> The Short-Form-36 Health Survey

- <sup>3</sup> The Hospital Anxiety and Depression Scale
- <sup>4</sup> The Trunk Impairment Scale
- <sup>5</sup> The International Cooperative Ataxia Rating Scale
- <sup>6</sup> The Minnesota Manual Dexterity Test
- <sup>7</sup> The System Usability Scale
- <sup>8</sup> The Nine-Hole Peg Test
- <sup>9</sup> The Arm Function in Multiple Sclerosis Questionnaire
- <sup>10</sup> The Coin Rotation Task
- <sup>11</sup> The Multiple Sclerosis Impact Scale-29
- <sup>12</sup> The International Physical Activity Questionnaire
- <sup>13</sup> The 6 Minute Walk Test
- <sup>14</sup> The Timed 25-foot Walk Test
- <sup>15</sup> The Multiple Sclerosis Walking Scale-12
- <sup>16</sup> The 5-Repitition Sit-to-Stand Test
- <sup>17</sup> The Paced Auditory Serial Addition Test
- <sup>18</sup> The Symbol Digits Modalities Test
- <sup>19</sup> The Cognitive Fatigability Index
- <sup>20</sup> The Modified Fatigue Impact Scale
- <sup>21</sup> The Fatigue Severity Scale
- <sup>22</sup> Expanded Disability Status Scale
- <sup>23</sup> The 2 Minute Walk Test
- <sup>24</sup> The Hamburg Quality of Life Questionnaire Multiple Sclerosis
- <sup>25</sup> The Multiple Sclerosis Walking Scale
- <sup>26</sup> The Godin–Leisure Time Exercise Questionnaire

- <sup>27</sup> The Timed Up and Go Test
- <sup>28</sup> The Würzburg Fatigue Inventory for Multiple Sclerosis
- <sup>29</sup> The 10 Meter Walk Test
- <sup>30</sup> The Berg Balance Scale
- <sup>31</sup> The University of Washington 6-Item Short Form Self-Efficacy Scale
- <sup>32</sup> The Oxford Participation and Activities Questionnaire
- <sup>33</sup> The Five-Level EuroQol-5 Dimensions Health State Utility Scale
- <sup>34</sup> The Multiple Sclerosis Quality of Life-54 Scale
- <sup>35</sup> The Multiple Sclerosis Self-Efficacy Scale
- <sup>36</sup> The Beck Depression Inventory
- <sup>37</sup> The Hamilton Depression Rating Scale
- <sup>38</sup> The Patient-Determined Disease Steps Scale
- <sup>39</sup> The Fatigue Impact Scale
