# Supplementary material for: At home e-based physical exercise programs in patients with multiple sclerosis: a scoping review
Source: Frontiers journal article supplement (doi:10.3389/fneur.2024.1449519), 2024-10-15
Supplement: Data_Sheet_2.PDF [file Data_Sheet_2.PDF]

| Type of e-based platform | Author year | Study Design, Country            | Type of control group                                                                                                     | Number of participants<br>Intervention group<br>Control group | Time of diagnosis<br>Intervention group<br>Control group | EDSS/PDDS<br>Intervention group<br>Control group      | Age<br>Intervention group<br>Control group |
|--------------------------|-------------|----------------------------------|---------------------------------------------------------------------------------------------------------------------------|---------------------------------------------------------------|----------------------------------------------------------|-------------------------------------------------------|--------------------------------------------|
| App                      | Ehling 2017 | Prospective pilot trial, Austria | Screenshots of selected exercises and patient reported outcomes on hard copy (paper). Wait-list for the APP-intervention. | 5 m / 5 f<br>6 m / 4 f                                        | Mean: 12.6 (8.8-16.5)<br>Mean: 16.3 (10.6-22.0)          | Mean EDDS: 4.2 (3.1-5.3)<br>Mean: EDDS: 5.4 (4.2-6.5) | Median: 46.6<br>Median: 50.5               |

|                 |                                                           |                                                                                     |                              |                    |                                                                    |                                                    |
|-----------------|-----------------------------------------------------------|-------------------------------------------------------------------------------------|------------------------------|--------------------|--------------------------------------------------------------------|----------------------------------------------------|
| Dogan<br>2023   | Randomized<br>controlled trial,<br>Turkey                 | Virtual reality<br>supported task-<br>oriented circuit<br>training in the<br>clinic | 2 m / 13 f<br><br>6 m / 11 f | Unknown            | Mean (SD):<br>EDSS 3.74 ±<br>0.92<br><br>Mean: EDSS<br>3.94 ± 1.04 | Mean: 36<br>± 8.19<br><br>Mean:<br>38.76 ±<br>5.53 |
| VanBeek<br>2020 | Pilot feasibility<br>interventional study,<br>Switzerland | N/A                                                                                 | 0 m / 9 f                    | Mean: 10.56 ± 9.76 | Mean: EDSS<br>3.89 ± 1.95                                          | 53.89 ±<br>12.27                                   |

|                 |                                                |                                                                 |                          |                                          |                                                          |                                                       |
|-----------------|------------------------------------------------|-----------------------------------------------------------------|--------------------------|------------------------------------------|----------------------------------------------------------|-------------------------------------------------------|
| vanBeek<br>2022 | Randomized<br>controlled trial,<br>Switzerland | arm- and hand<br>strengthening<br>exercises using<br>Thera-band | 5 m / 21 f<br>7 m / 15 f | Mean: 12.33 ± 8.23<br>Mean: 11.69 ± 9.57 | Mean: EDSS:<br>2.98 ± 1.81<br>Mean: EDSS:<br>3.03 ± 2.23 | Mean:<br>50.84 ±<br>14.84<br>Mean:<br>48.40±14.6<br>1 |
|-----------------|------------------------------------------------|-----------------------------------------------------------------|--------------------------|------------------------------------------|----------------------------------------------------------|-------------------------------------------------------|

|                 |                            |     |      |                 |         |                 |
|-----------------|----------------------------|-----|------|-----------------|---------|-----------------|
| VanGeel<br>2020 | Clinical trial,<br>Belgium | N/A | 12 f | Median: 7 years | Unknown | Median:<br>42.5 |
|-----------------|----------------------------|-----|------|-----------------|---------|-----------------|

|  |                 |                                                  |                                                                                                                                        |                              |                                            |                                                                     |                                                 |
|--|-----------------|--------------------------------------------------|----------------------------------------------------------------------------------------------------------------------------------------|------------------------------|--------------------------------------------|---------------------------------------------------------------------|-------------------------------------------------|
|  | Nasseri<br>2020 | Pilot randomized<br>controlled trial,<br>Germany | In the control<br>group,<br>participants<br>received a<br>leaflet with<br>unspecific<br>information<br>about exercising<br>in general. | 10 m / 9 f<br><br>9 m / 11 f | Mean: 13.1 ± 5.6.<br><br>Mean: 20.1 ± 13.0 | Median EDSS:<br>3.5 (2.0-6.0).<br><br>Median: EDSS<br>3.5 (3.0-6.0) | Mean: 49.6<br>± 8.5.<br><br>Mean: 52.5<br>± 7.3 |
|  |                 |                                                  |                                                                                                                                        |                              |                                            |                                                                     |                                                 |
|  |                 |                                                  |                                                                                                                                        |                              |                                            |                                                                     |                                                 |
|  |                 |                                                  |                                                                                                                                        |                              |                                            |                                                                     |                                                 |
|  |                 |                                                  |                                                                                                                                        |                              |                                            |                                                                     |                                                 |
|  |                 |                                                  |                                                                                                                                        |                              |                                            |                                                                     |                                                 |
|  |                 |                                                  |                                                                                                                                        |                              |                                            |                                                                     |                                                 |
|  |                 |                                                  |                                                                                                                                        |                              |                                            |                                                                     |                                                 |
|  |                 |                                                  |                                                                                                                                        |                              |                                            |                                                                     |                                                 |
|  |                 |                                                  |                                                                                                                                        |                              |                                            |                                                                     |                                                 |
|  |                 |                                                  |                                                                                                                                        |                              |                                            |                                                                     |                                                 |
|  |                 |                                                  |                                                                                                                                        |                              |                                            |                                                                     |                                                 |
|  |                 |                                                  |                                                                                                                                        |                              |                                            |                                                                     |                                                 |
|  |                 |                                                  |                                                                                                                                        |                              |                                            |                                                                     |                                                 |
|  |                 |                                                  |                                                                                                                                        |                              |                                            |                                                                     |                                                 |
|  |                 |                                                  |                                                                                                                                        |                              |                                            |                                                                     |                                                 |
|  |                 |                                                  |                                                                                                                                        |                              |                                            |                                                                     |                                                 |
|  |                 |                                                  |                                                                                                                                        |                              |                                            |                                                                     |                                                 |
|  |                 |                                                  |                                                                                                                                        |                              |                                            |                                                                     |                                                 |
|  |                 |                                                  |                                                                                                                                        |                              |                                            |                                                                     |                                                 |
|  |                 |                                                  |                                                                                                                                        |                              |                                            |                                                                     |                                                 |
|  |                 |                                                  |                                                                                                                                        |                              |                                            |                                                                     |                                                 |
|  |                 |                                                  |                                                                                                                                        |                              |                                            |                                                                     |                                                 |
|  |                 |                                                  |                                                                                                                                        |                              |                                            |                                                                     |                                                 |
|  |                 |                                                  |                                                                                                                                        |                              |                                            |                                                                     |                                                 |
|  |                 |                                                  |                                                                                                                                        |                              |                                            |                                                                     |                                                 |
|  |                 |                                                  |                                                                                                                                        |                              |                                            |                                                                     |                                                 |
|  |                 |                                                  |                                                                                                                                        |                              |                                            |                                                                     |                                                 |
|  |                 |                                                  |                                                                                                                                        |                              |                                            |                                                                     |                                                 |
|  |                 |                                                  |                                                                                                                                        |                              |                                            |                                                                     |                                                 |
|  |                 |                                                  |                                                                                                                                        |                              |                                            |                                                                     |                                                 |
|  |                 |                                                  |                                                                                                                                        |                              |                                            |                                                                     |                                                 |
|  |                 |                                                  |                                                                                                                                        |                              |                                            |                                                                     |                                                 |
|  |                 |                                                  |                                                                                                                                        |                              |                                            |                                                                     |                                                 |
|  |                 |                                                  |                                                                                                                                        |                              |                                            |                                                                     |                                                 |
|  |                 |                                                  |                                                                                                                                        |                              |                                            |                                                                     |                                                 |
|  |                 |                                                  |                                                                                                                                        |                              |                                            |                                                                     |                                                 |
|  |                 |                                                  |                                                                                                                                        |                              |                                            |                                                                     |                                                 |
|  |                 |                                                  |                                                                                                                                        |                              |                                            |                                                                     |                                                 |
|  |                 |                                                  |                                                                                                                                        |                              |                                            |                                                                     |                                                 |
|  |                 |                                                  |                                                                                                                                        |                              |                                            |                                                                     |                                                 |
|  |                 |                                                  |                                                                                                                                        |                              |                                            |                                                                     |                                                 |
|  |                 |                                                  |                                                                                                                                        |                              |                                            |                                                                     |                                                 |
|  |                 |                                                  |                                                                                                                                        |                              |                                            |                                                                     |                                                 |
|  |                 |                                                  |                                                                                                                                        |                              |                                            |                                                                     |                                                 |
|  |                 |                                                  |                                                                                                                                        |                              |                                            |                                                                     |                                                 |
|  |                 |                                                  |                                                                                                                                        |                              |                                            |                                                                     |                                                 |
|  |                 |                                                  |                                                                                                                                        |                              |                                            |                                                                     |                                                 |
|  |                 |                                                  |                                                                                                                                        |                              |                                            |                                                                     |                                                 |
|  |                 |                                                  |                                                                                                                                        |                              |                                            |                                                                     |                                                 |
|  |                 |                                                  |                                                                                                                                        |                              |                                            |                                                                     |                                                 |
|  |                 |                                                  |                                                                                                                                        |                              |                                            |                                                                     |                                                 |
|  |                 |                                                  |                                                                                                                                        |                              |                                            |                                                                     |                                                 |
|  |                 |                                                  |                                                                                                                                        |                              |                                            |                                                                     |                                                 |
|  |                 |                                                  |                                                                                                                                        |                              |                                            |                                                                     |                                                 |
|  |                 |                                                  |                                                                                                                                        |                              |                                            |                                                                     |                                                 |
|  |                 |                                                  |                                                                                                                                        |                              |                                            |                                                                     |                                                 |
|  |                 |                                                  |                                                                                                                                        |                              |                                            |                                                                     |                                                 |
|  |                 |                                                  |                                                                                                                                        |                              |                                            |                                                                     |                                                 |
|  |                 |                                                  |                                                                                                                                        |                              |                                            |                                                                     |                                                 |
|  |                 |                                                  |                                                                                                                                        |                              |                                            |                                                                     |                                                 |
|  |                 |                                                  |                                                                                                                                        |                              |                                            |                                                                     |                                                 |
|  |                 |                                                  |                                                                                                                                        |                              |                                            |                                                                     |                                                 |
|  |                 |                                                  |                                                                                                                                        |                              |                                            |                                                                     |                                                 |
|  |                 |                                                  |                                                                                                                                        |                              |                                            |                                                                     |                                                 |
|  |                 |                                                  |                                                                                                                                        |                              |                                            |                                                                     |                                                 |
|  |                 |                                                  |                                                                                                                                        |                              |                                            |                                                                     |                                                 |
|  |                 |                                                  |                                                                                                                                        |                              |                                            |                                                                     |                                                 |
|  |                 |                                                  |                                                                                                                                        |                              |                                            |                                                                     |                                                 |
|  |                 |                                                  |                                                                                                                                        |                              |                                            |                                                                     |                                                 |
|  |                 |                                                  |                                                                                                                                        |                              |                                            |                                                                     |                                                 |
|  |                 |                                                  |                                                                                                                                        |                              |                                            |                                                                     |                                                 |
|  |                 |                                                  |                                                                                                                                        |                              |                                            |                                                                     |                                                 |
|  |                 |                                                  |                                                                                                                                        |                              |                                            |                                                                     |                                                 |
|  |                 |                                                  |                                                                                                                                        |                              |                                            |                                                                     |                                                 |
|  |                 |                                                  |                                                                                                                                        |                              |                                            |                                                                     |                                                 |
|  |                 |                                                  |                                                                                                                                        |                              |                                            |                                                                     |                                                 |
|  |                 |                                                  |                                                                                                                                        |                              |                                            |                                                                     |                                                 |
|  |                 |                                                  |                                                                                                                                        |                              |                                            |                                                                     |                                                 |
|  |                 |                                                  |                                                                                                                                        |                              |                                            |                                                                     |                                                 |
|  |                 |                                                  |                                                                                                                                        |                              |                                            |                                                                     |                                                 |
|  |                 |                                                  |                                                                                                                                        |                              |                                            |                                                                     |                                                 |
|  |                 |                                                  |                                                                                                                                        |                              |                                            |                                                                     |                                                 |
|  |                 |                                                  |                                                                                                                                        |                              |                                            |                                                                     |                                                 |
|  |                 |                                                  |                                                                                                                                        |                              |                                            |                                                                     |                                                 |
|  |                 |                                                  |                                                                                                                                        |                              |                                            |                                                                     |                                                 |
|  |                 |                                                  |                                                                                                                                        |                              |                                            |                                                                     |                                                 |
|  |                 |                                                  |                                                                                                                                        |                              |                                            |                                                                     |                                                 |
|  |                 |                                                  |                                                                                                                                        |                              |                                            |                                                                     |                                                 |
|  |                 |                                                  |                                                                                                                                        |                              |                                            |                                                                     |                                                 |
|  |                 |                                                  |                                                                                                                                        |                              |                                            |                                                                     |                                                 |
|  |                 |                                                  |                                                                                                                                        |                              |                                            |                                                                     |                                                 |
|  |                 |                                                  |                                                                                                                                        |                              |                                            |                                                                     |                                                 |
|  |                 |                                                  |                                                                                                                                        |                              |                                            |                                                                     |                                                 |
|  |                 |                                                  |                                                                                                                                        |                              |                                            |                                                                     |                                                 |
|  |                 |                                                  |                                                                                                                                        |                              |                                            |                                                                     |                                                 |
|  |                 |                                                  |                                                                                                                                        |                              |                                            |                                                                     |                                                 |
|  |                 |                                                  |                                                                                                                                        |                              |                                            |                                                                     |                                                 |
|  |                 |                                                  |                                                                                                                                        |                              |                                            |                                                                     |                                                 |
|  |                 |                                                  |                                                                                                                                        |                              |                                            |                                                                     |                                                 |
|  |                 |                                                  |                                                                                                                                        |                              |                                            |                                                                     |                                                 |
|  |                 |                                                  |                                                                                                                                        |                              |                                            |                                                                     |                                                 |
|  |                 |                                                  |                                                                                                                                        |                              |                                            |                                                                     |                                                 |
|  |                 |                                                  |                                                                                                                                        |                              |                                            |                                                                     |                                                 |
|  |                 |                                                  |                                                                                                                                        |                              |                                            |                                                                     |                                                 |
|  |                 |                                                  |                                                                                                                                        |                              |                                            |                                                                     |                                                 |
|  |                 |                                                  |                                                                                                                                        |                              |                                            |                                                                     |                                                 |
|  |                 |                                                  |                                                                                                                                        |                              |                                            |                                                                     |                                                 |
|  |                 |                                                  |                                                                                                                                        |                              |                                            |                                                                     |                                                 |
|  |                 |                                                  |                                                                                                                                        |                              |                                            |                                                                     |                                                 |
|  |                 |                                                  |                                                                                                                                        |                              |                                            |                                                                     |                                                 |
|  |                 |                                                  |                                                                                                                                        |                              |                                            |                                                                     |                                                 |
|  |                 |                                                  |                                                                                                                                        |                              |                                            |                                                                     |                                                 |
|  |                 |                                                  |                                                                                                                                        |                              |                                            |                                                                     |                                                 |
|  |                 |                                                  |                                                                                                                                        |                              |                                            |                                                                     |                                                 |
|  |                 |                                                  |                                                                                                                                        |                              |                                            |                                                                     |                                                 |
|  |                 |                                                  |                                                                                                                                        |                              |                                            |                                                                     |                                                 |
|  |                 |                                                  |                                                                                                                                        |                              |                                            |                                                                     |                                                 |
|  |                 |                                                  |                                                                                                                                        |                              |                                            |                                                                     |                                                 |
|  |                 |                                                  |                                                                                                                                        |                              |                                            |                                                                     |                                                 |
|  |                 |                                                  |                                                                                                                                        |                              |                                            |                                                                     |                                                 |
|  |                 |                                                  |                                                                                                                                        |                              |                                            |                                                                     |                                                 |
|  |                 |                                                  |                                                                                                                                        |                              |                                            |                                                                     |                                                 |
|  |                 |                                                  |                                                                                                                                        |                              |                                            |                                                                     |                                                 |
|  |                 |                                                  |                                                                                                                                        |                              |                                            |                                                                     |                                                 |
|  |                 |                                                  |                                                                                                                                        |                              |                                            |                                                                     |                                                 |
|  |                 |                                                  |                                                                                                                                        |                              |                                            |                                                                     |                                                 |
|  |                 |                                                  |                                                                                                                                        |                              |                                            |                                                                     |                                                 |
|  |                 |                                                  |                                                                                                                                        |                              |                                            |                                                                     |                                                 |
|  |                 |                                                  |                                                                                                                                        |                              |                                            |                                                                     |                                                 |
|  |                 |                                                  |                                                                                                                                        |                              |                                            |                                                                     |                                                 |
|  |                 |                                                  |                                                                                                                                        |                              |                                            |                                                                     |                                                 |
|  |                 |                                                  |                                                                                                                                        |                              |                                            |                                                                     |                                                 |
|  |                 |                                                  |                                                                                                                                        |                              |                                            |                                                                     |                                                 |
|  |                 |                                                  |                                                                                                                                        |                              |                                            |                                                                     |                                                 |
|  |                 |                                                  |                                                                                                                                        |                              |                                            |                                                                     |                                                 |
|  |                 |                                                  |                                                                                                                                        |                              |                                            |                                                                     |                                                 |
|  |                 |                                                  |                                                                                                                                        |                              |                                            |                                                                     |                                                 |
|  |                 |                                                  |                                                                                                                                        |                              |                                            |                                                                     |                                                 |
|  |                 |                                                  |                                                                                                                                        |                              |                                            |                                                                     |                                                 |
|  |                 |                                                  |                                                                                                                                        |                              |                                            |                                                                     |                                                 |
|  |                 |                                                  |                                                                                                                                        |                              |                                            |                                                                     |                                                 |
|  |                 |                                                  |                                                                                                                                        |                              |                                            |                                                                     |                                                 |
|  |                 |                                                  |                                                                                                                                        |                              |                                            |                                                                     |                                                 |
|  |                 |                                                  |                                                                                                                                        |                              |                                            |                                                                     |                                                 |
|  |                 |                                                  |                                                                                                                                        |                              |                                            |                                                                     |                                                 |
|  |                 |                                                  |                                                                                                                                        |                              |                                            |                                                                     |                                                 |
|  |                 |                                                  |                                                                                                                                        |                              |                                            |                                                                     |                                                 |
|  |                 |                                                  |                                                                                                                                        |                              |                                            |                                                                     |                                                 |
|  |                 |                                                  |                                                                                                                                        |                              |                                            |                                                                     |                                                 |
|  |                 |                                                  |                                                                                                                                        |                              |                                            |                                                                     |                                                 |
|  |                 |                                                  |                                                                                                                                        |                              |                                            |                                                                     |                                                 |
|  |                 |                                                  |                                                                                                                                        |                              |                                            |                                                                     |                                                 |
|  |                 |                                                  |                                                                                                                                        |                              |                                            |                                                                     |                                                 |
|  |                 |                                                  |                                                                                                                                        |                              |                                            |                                                                     |                                                 |
|  |                 |                                                  |                                                                                                                                        |                              |                                            |                                                                     |                                                 |
|  |                 |                                                  |                                                                                                                                        |                              |                                            |                                                                     |                                                 |
|  |                 |                                                  |                                                                                                                                        |                              |                                            |                                                                     |                                                 |
|  |                 |                                                  |                                                                                                                                        |                              |                                            |                                                                     |                                                 |
|  |                 |                                                  |                                                                                                                                        | </                           |                                            |                                                                     |                                                 |

|                    |                                                                   |                                                                                                                                                                                                   |             |                    |                               |                      |
|--------------------|-------------------------------------------------------------------|---------------------------------------------------------------------------------------------------------------------------------------------------------------------------------------------------|-------------|--------------------|-------------------------------|----------------------|
| Paul<br>2014       | Randomized<br>controlled pilot trial,<br>UK                       | usual care<br>which was<br>general advice<br>on exercise and<br>signposting to<br>local exercise<br>options.                                                                                      | 3 m / 12 f  | Mean: 12.5 ± 7.1   | Mean: EDSS:<br>6.0 ± 0.5      | Mean: 50.8<br>± 7.4  |
|                    |                                                                   |                                                                                                                                                                                                   | 3 m / 12 f  | Mean: 12.8 ± 10.9  | Mean: EDSS<br>5.8 ± 0.5       | Mean: 52.5<br>± 14.3 |
| Conroy<br>2018     | Randomised, single-<br>blind controlled trial,<br>USA             | Routine home-<br>based exercise -<br>The control<br>group received<br>individualised<br>exercise pre-<br>scriptions in<br>paper hand-out<br>form common<br>for PT home<br>exercise<br>programmes. | 9 m / 7 f   | Mean: 14.2 ± 7.8   | Mean: PDDS<br>4.5 ± 1.6       | Mean: 50.4<br>± 8.1  |
|                    |                                                                   |                                                                                                                                                                                                   | 3 m / 5 f   | Mean: 14.7 ± 9.8   | Mean: PDDS<br>3.9 ± 1.4       | Mean: 54.3<br>± 5.9  |
| Chanpim<br>ol 2020 | Pilot study, USA                                                  | N/A                                                                                                                                                                                               | 2 m / 8 f   | Mean: 8.0 ± 6.3    | Median: EDSS<br>5.0 (3.5-6.0) | Mean: 49.6<br>± 9.0  |
| Busse<br>2022      | Single-arm non-<br>randomized<br>feasibility study, UK            | N/A                                                                                                                                                                                               | 6 m / 15 f  | Mean: 17.7 ± 11.7  | Range: EDSS 6-<br>7.5         | Mean: 60.9<br>± 9.2  |
| Paul<br>2019       | Multicentre,<br>randomized<br>controlled feasibility<br>study, UK | printed sheet of<br>exercises.                                                                                                                                                                    | 13 m / 32 f | Median: 10 (6-18)  | Median EDSS:<br>6.0 (6-6)     | Mean: 55.6<br>± 10.2 |
|                    |                                                                   |                                                                                                                                                                                                   | 8 m / 37 f  | Median: 15 (10-23) | Median: EDSS<br>6.0 (6-6)     | Mean: 56.5<br>± 9.1  |

|                      |                                                   |                                                                                                                     |                            |                                        |                                                        |                                              |
|----------------------|---------------------------------------------------|---------------------------------------------------------------------------------------------------------------------|----------------------------|----------------------------------------|--------------------------------------------------------|----------------------------------------------|
| Tallner<br>2016      | Randomized<br>controlled trial,<br>Germany        | wait-list control                                                                                                   | 15 m / 44 f<br>17 m / 50 f | Mean: 9.8 ± 9.2<br>Mean: 9.2 ± 7.2     | Mean(SD):<br>EDSS 2.8 ± 0.8<br>Mean: EDSS<br>2.7 ± 0.8 | Mean: 40.9<br>± 10.4<br>Mean: 40.7<br>± 9.5  |
| Paul<br>2010         | Randomized<br>controlled pilot trial,<br>Scotland | usual care<br>which was<br>general advice<br>on exercise and<br>signposting to<br>local exercise<br>options         | 3 m / 12 f<br>3 m / 12 f   | Mean: 12.5 ± 7.1<br>Mean: 12.8 ± 10.9  | Mean: EDSS<br>6.0 ± 0.5<br>Mean: EDSS<br>5.8 ± 0.5     | Mean: 50.8<br>± 7.4<br>Mean: 52.5<br>± 14.3  |
| Jeong<br>2020        | Longitudinal cohort<br>study, USA                 | N/A                                                                                                                 | 2 m / 15 f                 | Range between 2.5 to<br>50.8 years     | Unknown                                                | Mean: 60.1<br>± 11.4                         |
| Finkelste<br>in 2008 | Pilot study, USA                                  | N/A                                                                                                                 | 2 m / 10 f                 | Mean: 13 ± 7                           | Mean: PDDS<br>3.7 ± 1.1                                | Mean: 52<br>± 4                              |
| Coulter<br>2017      | Randomised<br>controlled pilot study,<br>Scotland | usual care<br>which was<br>general advice<br>on exercise and<br>signposting to<br>local exercise<br>options outwith | 3 m / 12 f<br>3 m / 12 f   | Mean: 12.5 ± 7.1.<br>Mean: 12.8 ± 10.9 | Mean: EDSS<br>6.0 ± 0.5<br>Mean: EDSS<br>5.8 ± 0.5     | Mean: 50.8<br>± 7.4.<br>Mean: 52.5<br>± 14.3 |

|                 |                |                                  |                                                                                                                                                                                                                                                                                                                                              |                           |                                         |                                                                                                                                  |                                          |
|-----------------|----------------|----------------------------------|----------------------------------------------------------------------------------------------------------------------------------------------------------------------------------------------------------------------------------------------------------------------------------------------------------------------------------------------|---------------------------|-----------------------------------------|----------------------------------------------------------------------------------------------------------------------------------|------------------------------------------|
|                 |                |                                  | the health service.                                                                                                                                                                                                                                                                                                                          |                           |                                         |                                                                                                                                  |                                          |
|                 | Knox 2022      | Qualitative study, UK            | paper based exercise                                                                                                                                                                                                                                                                                                                         | 13<br>5                   | Median: 19 years                        | Median: PDSS 4 (2-6)                                                                                                             | Median: 57.5                             |
|                 | Pilutti 2013   | Randomized controlled trial, USA | wait-list control                                                                                                                                                                                                                                                                                                                            | 30 f / 11 m<br>32 f / 9 m | Mean: 10.6 ± 7.1)<br>Mean: 13.0 ± 9.1   | Median: PDDS 2.0<br>Median: PDDS 3.0                                                                                             | Mean: 48.4 ± 9.1<br>Mean: 49.5 ± 9.2     |
|                 | Dennett 2020   | Qualitative study, UK            | paper based exercise                                                                                                                                                                                                                                                                                                                         | 1 m / 10 f                | Range 1-40 years                        | Range EDSS 4-6.5                                                                                                                 | Range 28-68                              |
| Virtual reality | Gutierrez 2013 | Clinical trial, Spain            | The control group (CG; <i>n</i> = 25) received physiotherapy treatment twice a week (40 min per session) at the MS Madrid Association and Foundation. The treatment was based on low-loads strength exercises (10 min per session), proprioception exercises on unstable surfaces and gait facilitation exercises (20 min per session), and, | 11 m / 13 f<br>9 m / 14 f | Mean: 9.68 ± 6.76<br>Mean: 10.86 ± 5.40 | Percentage: EDSS score 3 (16.4%) EDSS 4 (75.5%) EDSS 5 (8.1%)<br>Percentage: EDSS score 3 (21.7%), EDSS 4 (60.9%) EDSS 5 (17.4%) | Mean: 39.69 ± 8.13<br>Mean: 42.78 ± 7.38 |

|                  |                                                                            |                                                                                                                                                                                                                                                                                                                               |                            |                                          |                                                              |                                          |
|------------------|----------------------------------------------------------------------------|-------------------------------------------------------------------------------------------------------------------------------------------------------------------------------------------------------------------------------------------------------------------------------------------------------------------------------|----------------------------|------------------------------------------|--------------------------------------------------------------|------------------------------------------|
|                  |                                                                            | finally, muscle-tendon stretching (10 min per session), (Patti et al., 2002).                                                                                                                                                                                                                                                 |                            |                                          |                                                              |                                          |
| Pagliari<br>2021 | Multicentre, rater-blinded, active controlled, and randomized trial, Italy | Usual care group who received at-home conventional motor and cognitive rehabilitation. the UC was an active comparator treatment and consisted of a written home-based self-administrated booklet with conventional motor and cognitive exercises tailored for pwMS with the same intensity and duration of the TR treatment. | 12 m / 18 f<br>12 m / 18 f | Mean: 12.68 ± 6.72<br>Mean: 15.36 ± 7.17 | Median: EDSS 5.0 (3.50–6.0).<br>Median: EDSS 4.50 (3.50–6.0) | Mean: 48.33 ± 9.66<br>Mean: 52.23 ± 9.34 |
| Kamm<br>2023     | Single-center, single-arm observational study, Switzerland                 | n/a                                                                                                                                                                                                                                                                                                                           | 4 m / 7 f                  | Mean: 15.38 ± 9.95                       | Mean: EDSS 4.28 ± 1.48                                       | Mean: 49.20 ± 10.87                      |



|                   |                |                                                      |                                                                                                                                                                                                                                              |                                            |                                        |                                                                              |                                                                               |
|-------------------|----------------|------------------------------------------------------|----------------------------------------------------------------------------------------------------------------------------------------------------------------------------------------------------------------------------------------------|--------------------------------------------|----------------------------------------|------------------------------------------------------------------------------|-------------------------------------------------------------------------------|
| Videoconferencing | Kahraman 2020  | Randomized controlled trial, Turkey                  | CG (waitlist-group)+HC.                                                                                                                                                                                                                      | 4 m / 16 f<br>1 m / 14 f<br>HC: 6 m / 14 f | Median: 4<br>Median: 4                 | Median: EDSS 1(0-1.75)<br>Median: EDSS 2 (0-2.5)                             | Median: 34.5<br>Median: 31                                                    |
|                   | Fjeldstad 2016 | Randomized feasibility and efficacy pilot study, USA | Group 1-unsupervised home exercise programme (control group)                                                                                                                                                                                 | 3 m / 7 f<br>PT=2 m / 7 f<br>CG=4 m / 6 f  | Unknown                                | Median: EDSS TR group=4.4 ± 1.0. PT group=4.3 ± 1.4.<br>Mean: EDSS 4.4 ± 1.1 | Mean: TR group 55.1 ± 13.9,<br>PT group: 54.7 ± 13.5.<br>Mean: CG 54.4 ± 10.8 |
|                   | Sebastiao 2018 | Feasibility randomized controlled trial, USA         | a light intensity stretching and minimal muscle strengthening program based on an illustrated manual for persons with MS developed by the National Multiple Sclerosis Society that involves major muscle groups of the upper and lower body. | 2 m / 13 f<br>1 m / 9 f                    | Mean: 21.9 ± 10.7<br>Mean: 19.9 ± 11.2 | Median: EDSS 3.75<br>EDSS: 4.25                                              | Mean: 63.8 ± 4.1<br>Mean: 65.1 ± 5.2                                          |

|                             |                                                           |                                                                                                                                                                                                                                                                                                                                                                                                                                                                                     |                           |                                                   |                                                                                                                                          |                                                        |
|-----------------------------|-----------------------------------------------------------|-------------------------------------------------------------------------------------------------------------------------------------------------------------------------------------------------------------------------------------------------------------------------------------------------------------------------------------------------------------------------------------------------------------------------------------------------------------------------------------|---------------------------|---------------------------------------------------|------------------------------------------------------------------------------------------------------------------------------------------|--------------------------------------------------------|
| Tarakci<br>2021             | Single-blind<br>randomized<br>controlled trial,<br>Turkey | N/A                                                                                                                                                                                                                                                                                                                                                                                                                                                                                 | 4 m / 11 f<br>3 m / 12 f  | Mean: $8.86 \pm 4.50$<br>Mean: $6.20 \pm 3.96$    | Median: EDSS<br>$3.46 \pm 1.31$<br>Median: EDSS<br>$3.40 \pm 1.53$                                                                       | Mean:<br>$39.46 \pm 10.59$<br>Mean: $41 \pm 11.09$     |
| Ortiz-<br>Gutierrez<br>2013 | Preliminary<br>interventional study,<br>Spain             | The control<br>group (CG; $n = 25$ ) received<br>physiotherapy<br>treatment twice<br>a week (40 min<br>per session) at<br>the MS Madrid<br>Association and<br>Foundation. The<br>treatment was<br>based on low-<br>loads strength<br>exercises (10<br>min per<br>session),<br>proprioception<br>exercises on<br>unstable<br>surfaces and<br>gait facilitation<br>exercises (20<br>min per<br>session), and,<br>finally, muscle-<br>tendon<br>stretching (10<br>min per<br>session). | 11 m / 13 f<br>9 m / 14 f | Mean: $9.68 \pm 6.76$ .<br>Mean: $10.86 \pm 5.40$ | Experimental<br>group: Score 3<br>EDSS 16.4 %<br>( $N = 4$ ) Score 4<br>EDSS 75.5 %<br>( $N = 17$ ) Score<br>5 EDSS 8.1 %<br>( $N = 3$ ) | Mean:<br>$39.69 \pm 8.13$<br>Mean:<br>$42.78 \pm 7.38$ |

|        |               |                         |                  |                          |         |                         |                                            |
|--------|---------------|-------------------------|------------------|--------------------------|---------|-------------------------|--------------------------------------------|
| E-mail | Keytsman 2019 | Clinical trial, Belgium | Healthy controls | 12 m / 6 f<br>14 m / 5 f | Unknown | Mean: EDSS<br>1.9 ± 1.1 | Mean:<br>41.7±8<br><br>Mean: 41.5<br>± 9.9 |
|--------|---------------|-------------------------|------------------|--------------------------|---------|-------------------------|--------------------------------------------|

|            |                                                      |                         |                          |                                      |                                                                                                                    |                                          |
|------------|------------------------------------------------------|-------------------------|--------------------------|--------------------------------------|--------------------------------------------------------------------------------------------------------------------|------------------------------------------|
| Kratz 2014 | Two-group, parallel randomized controlled trial, USA | wait-list control group | 5 m / 39 f<br>8 m / 40 f | Mean: 9.4 ± 7.1,<br>Mean: 11.7 ± 8.3 | Number (%):<br>EDSS 4.0: 24 (54), EDSS 4.5-6.5: 20(6)<br><br>Number (%):<br>EDSS 4.0: 24(50), EDSS 4.5-6.5: 24(50) | Mean:<br>47.1±8.9<br>Mean: 49.7<br>± 7.9 |
|------------|------------------------------------------------------|-------------------------|--------------------------|--------------------------------------|--------------------------------------------------------------------------------------------------------------------|------------------------------------------|

|                     |                                                              |                                                                                                                                                       |                                          |                                                    |                                                                  |                                                                       |
|---------------------|--------------------------------------------------------------|-------------------------------------------------------------------------------------------------------------------------------------------------------|------------------------------------------|----------------------------------------------------|------------------------------------------------------------------|-----------------------------------------------------------------------|
| Abasiyan<br>ik 2018 | Randomized<br>controlled trial,<br>Turkey                    | home exercise:<br>The control<br>group subjects<br>were given<br>written<br>standardized<br>home exercises<br>for 3 times per<br>week for 8<br>weeks. | 4 m / 12 f<br><br>6 m / 11 f             | Mean: $12.59 \pm 6.23$<br><br>Mean: $9.83 \pm 8.7$ | Mean: EDDS<br>$3.06 \pm 1.6$<br><br>Mean: EDDS<br>$3.24 \pm 1.7$ | Mean:<br>$42.50 \pm$<br>$6.76$<br><br>Mean:<br>$48.24 \pm$<br>$11.79$ |
| Bombard<br>ier 2013 | Single-blind, two-arm<br>randomized<br>controlled trial, USA | waitlist control                                                                                                                                      | 70 (75.7% female)<br><br>60 (80% female) | Mean: 6.3<br><br>Mean: 6.4                         | Unknown                                                          | Mean: 47.5<br><br>Mean: 45                                            |
| Kratz<br>2020       | Pilot randomized<br>study, USA                               | in person with<br>trainer 1/week                                                                                                                      | 1 m / 9 f<br><br>1 m / 9 f               | Median: 13.5<br><br>Median: 4.5                    | Median: PDDS<br>2<br><br>Median PDDS<br>3.5                      | Mean: $45.9$<br>$\pm 8$<br><br>Mean: $50.7$<br>$\pm$ SD 7.4           |
| Turner<br>2016      | Single blinded rct,<br>USA                                   | self directed<br>education                                                                                                                            | 9 m / 22 f<br><br>14 m / 19 f            | Mean: $11.3 \pm 9$<br><br>Mean: $11.8 \pm 10.4$    | Mean: Mobility<br>performance<br>scale: $2.3 \pm 1.5$            | Mean: $52.7$<br>$\pm 11.6$                                            |

|             |                |                                  |                   |                          |                                     |                                              |                   |
|-------------|----------------|----------------------------------|-------------------|--------------------------|-------------------------------------|----------------------------------------------|-------------------|
| Combination | Dlugonski 2012 | Randomized controlled trial, USA | Wait-list control | 4 m / 18 f<br>2 m / 21 f | Mean: 10.3 ± 9.2<br>Mean: 8.5 ± 6.2 | Mean: Mobility performance scale 2.73 ± 1.35 | Mean: 53.6 ± 13.1 |
|             |                |                                  |                   |                          |                                     | Median: PDDS 1.0                             | Mean: 48.5 ± 10.1 |
|             |                |                                  |                   |                          |                                     | Median: PDDS 1.0                             | Mean: 44.8 ± 9.1  |

|                                            |                                             |                                            |                                                                                              |                                                                                                                       |                                                                                |                                                                                                                                                  |
|--------------------------------------------|---------------------------------------------|--------------------------------------------|----------------------------------------------------------------------------------------------|-----------------------------------------------------------------------------------------------------------------------|--------------------------------------------------------------------------------|--------------------------------------------------------------------------------------------------------------------------------------------------|
| Mardani<br>yan<br>Ghahfarr<br>okhi<br>2021 | Pilot randomized<br>feasibility study, Iran | home-based<br>neuro-functional<br>training | 9 m / 3 f<br>11 m / 2 f                                                                      | Mean: $9.73 \pm 5.29$<br>Mean: $8.30 \pm 6.48$                                                                        | Mean: EDSS<br>$4.13 \pm 0.97$<br>Mean: EDSS<br>$4.57 \pm 1.30$                 | Mean:<br>$39.87 \pm 9.09$<br>Mean:<br>$37.50 \pm 8.58$                                                                                           |
| Sandroff<br>2014                           | Randomized<br>controlled trial, USA         | wait-list control                          | PDDS 0-2: 6 m / 12 f<br>PDDS 3-6; 4 m / 15 f<br>PDDS 0-2; 3 m / 15 f<br>PDDS 3-6: 6 m / 15 f | Mean: PDDS 0-2: $9.0 \pm 7.2$ , PDDS 3-6: $12.3 \pm 6.3$<br>Mean: PDDS 0-2: $12.7 \pm 9.7$ , PDDS 3-6: $14.0 \pm 9.0$ | PDSS 0-2:<br>n=18) PDSS 3-6<br>(n=19)<br>PDSS 0-2<br>(n=18) PDSS 3-6<br>(n=21) | Mean:<br>PDDS 0-2;<br>$45.1 \pm 10.1$ ,<br>PDDS 3-6;<br>$52.1 \pm 6.4$<br>Mean:<br>PDDS 0-2;<br>$49.0 \pm 10.0$ ,<br>PDDS 3-6;<br>$51.6 \pm 6.7$ |

|                               |           |                                  |                                                                                                                                                                                                                                                                                                                                                                                                                                                                                                                        |                                                       |                                                             |         |                                                                              |
|-------------------------------|-----------|----------------------------------|------------------------------------------------------------------------------------------------------------------------------------------------------------------------------------------------------------------------------------------------------------------------------------------------------------------------------------------------------------------------------------------------------------------------------------------------------------------------------------------------------------------------|-------------------------------------------------------|-------------------------------------------------------------|---------|------------------------------------------------------------------------------|
| Videoconferencing & telephone | Plow 2022 | Randomized controlled trial, USA | Participants (n = 142) were randomly assigned into a contact-control intervention (CC), physical activity-only intervention (PA-only), or physical activity plus fatigue self-management intervention (FMP). The PA-only intervention consisted of three group teleconferencing sessions delivered once per week. The FMP and CC interventions consisted of six group teleconferencing sessions delivered once per week. After the third session, participants in each group received four individually tailored phone | 11 m / 46 f<br>PA-only: 9 m / 41 f<br>FMP: 5 m / 58 f | All patient groups:<br>Mean number of years<br>12.67 ± 8.68 | Unknown | Mean: PA:<br>51.42 ± 9.85, FMP:<br>53.06 ± 6.58<br><br>Mean:<br>52.09 ± 8.83 |
|-------------------------------|-----------|----------------------------------|------------------------------------------------------------------------------------------------------------------------------------------------------------------------------------------------------------------------------------------------------------------------------------------------------------------------------------------------------------------------------------------------------------------------------------------------------------------------------------------------------------------------|-------------------------------------------------------|-------------------------------------------------------------|---------|------------------------------------------------------------------------------|

calls delivered  
once every other  
week.

Participants in  
the PA-only and  
FMp interven-  
tions during the  
group  
teleconference  
sessions were  
taught how to  
engage in a  
pedometer-  
based walking  
programme, set  
goals, overcome  
obstacles, and  
self- monitor  
progress.

Participants in  
the FMp  
interven- tion  
received  
additional  
content adapted  
from the  
Managing  
Fatigue  
programme.<sup>13,30</sup>

Participants in  
the CC  
intervention  
received generic  
health  
information  
(e.g. healthy  
eating and



preventive  
screening).

|                    |                 |                                                  |                                                          |                                                                    |         |         |                                                           |
|--------------------|-----------------|--------------------------------------------------|----------------------------------------------------------|--------------------------------------------------------------------|---------|---------|-----------------------------------------------------------|
| DVD &<br>telephone | Fleming<br>2019 | Randomized<br>controlled pilot trial,<br>Ireland | supervised<br>pilates session<br>or wait-list<br>control | 0 m / 6 f<br><br>supervised: 0 m / 5 f<br><br>wait-list: 1 m / 6 f | Unknown | Unknown | Mean: 46.0<br>± 9.4,<br><br>Mean:<br>Supervised<br>group: |
|--------------------|-----------------|--------------------------------------------------|----------------------------------------------------------|--------------------------------------------------------------------|---------|---------|-----------------------------------------------------------|

|                                                                                     |             |                                                                       |                                                                                                                     |                                      |                                                                                 |                                                                                          |                                                           |
|-------------------------------------------------------------------------------------|-------------|-----------------------------------------------------------------------|---------------------------------------------------------------------------------------------------------------------|--------------------------------------|---------------------------------------------------------------------------------|------------------------------------------------------------------------------------------|-----------------------------------------------------------|
|                                                                                     |             |                                                                       |                                                                                                                     |                                      |                                                                                 |                                                                                          | 53.8 ± 7.95,                                              |
|                                                                                     |             |                                                                       |                                                                                                                     |                                      |                                                                                 |                                                                                          | Wait-list group: 51.3 ± 6.8                               |
| Videoconferencing or phone & newsletter & fitbit one (to measure physical activity) | Manns 2020  | Pre-post, single-group, repeated measures intervention design, Canada | N/A                                                                                                                 | 2 m / 37 f                           | Mean: 14.3 ± 11.3                                                               | Median: EDSS 5.5                                                                         | Mean: 50.5 ± 10.3                                         |
|                                                                                     |             |                                                                       |                                                                                                                     |                                      |                                                                                 |                                                                                          |                                                           |
|                                                                                     |             |                                                                       |                                                                                                                     |                                      |                                                                                 |                                                                                          |                                                           |
|                                                                                     |             |                                                                       |                                                                                                                     |                                      |                                                                                 |                                                                                          |                                                           |
|                                                                                     |             |                                                                       |                                                                                                                     |                                      |                                                                                 |                                                                                          |                                                           |
|                                                                                     |             |                                                                       |                                                                                                                     |                                      |                                                                                 |                                                                                          |                                                           |
|                                                                                     |             |                                                                       |                                                                                                                     |                                      |                                                                                 |                                                                                          |                                                           |
|                                                                                     |             |                                                                       |                                                                                                                     |                                      |                                                                                 |                                                                                          |                                                           |
|                                                                                     |             |                                                                       |                                                                                                                     |                                      |                                                                                 |                                                                                          |                                                           |
| Google meet & Zoom & Instagram                                                      | Najafi 2023 | Single-blinded RCT, Iran                                              | female MS patients maintained their current lifestyle without regular physical activity or exercise for eight weeks | Tele pilates: 15 f<br>Tele-yoga 15 f | Mean: Tele-pilates: 10.93 ± 4.38, Tele-yoga 8.0 ± 5.84<br><br>Mean: 9.27 ± 8.37 | Mean: EDSS Tele-pilates: 2.5 ± 1.32, Tele-yoga: 2.5 ± 1.19<br><br>Mean: EDSS 2.66 ± 1.03 | Mean: Tele-pilates: 36.20 ± 4.33, Tele-yoga: 37.40 ± 6.03 |

| Study                                                              |              |                                                                    |                  |                           |                                    | Mean: 40.40 ± 5.35                                                          |
|--------------------------------------------------------------------|--------------|--------------------------------------------------------------------|------------------|---------------------------|------------------------------------|-----------------------------------------------------------------------------|
| Website & Yamax SW-401 Digiwalker pedometer & Goal Tracker & Skype | Pilutti 2014 | Secondary analysis of data from a randomized controlled trial, USA | waitlist control | 11 m / 30 f<br>9 m / 32 f | Mean: 10.67 ± 1<br>Mean: 13.09 ± 1 | Median: PDDS 2.0<br>Median PDSS 3.0<br>Mean: 48.4 ± 9.1<br>Mean: 49.5 ± 9.2 |

|                                                                                                         |                |                                              |                   |                          |                                       |                                    |                                       |
|---------------------------------------------------------------------------------------------------------|----------------|----------------------------------------------|-------------------|--------------------------|---------------------------------------|------------------------------------|---------------------------------------|
| DVD & programme manual & calendars & logbook & behavioural change interaction & videochats & newsletter | Learmonth 2016 | Feasibility randomized controlled study, USA | wait-list control | 1 m / 28 f<br>1 m / 27 f | Mean: 14.8 ± 8.5.<br>Mean: 13.0 ± 7.7 | Median: EDSS 1.25<br>Median EDSS 2 | Mean: 48.7 ± 10.4<br>Mean: 48.2 ± 9.1 |
|---------------------------------------------------------------------------------------------------------|----------------|----------------------------------------------|-------------------|--------------------------|---------------------------------------|------------------------------------|---------------------------------------|

|                              |           |                                  |                                                             |                                                            |                                                    |                                                                      |                                           |
|------------------------------|-----------|----------------------------------|-------------------------------------------------------------|------------------------------------------------------------|----------------------------------------------------|----------------------------------------------------------------------|-------------------------------------------|
| Telephone & teleconferencing | Plow 2019 | Randomized controlled trial, USA | Participants in the CC intervention received information on | pa-only: 14 m / 55 f<br>FM+: 7 m / 63 f<br>CC: 11 m / 58 f | Mean: PA-only: 14.1 ± 9.6<br>Mean: FM: 12.7 ± 7.9, | Number (%): PDSS: Mild disability PA: 13 (18.8) FM+: 9 (12.9) CC: 12 | Mean: PA-only=51.2 ± 9.2, FM+=53.2 ± 6.5, |
|------------------------------|-----------|----------------------------------|-------------------------------------------------------------|------------------------------------------------------------|----------------------------------------------------|----------------------------------------------------------------------|-------------------------------------------|

|                       |                 |                                                |                                                    |             |                      |                                                                                                                                                                                                                                                                                                                                                                                                                                                                                                   |                     |
|-----------------------|-----------------|------------------------------------------------|----------------------------------------------------|-------------|----------------------|---------------------------------------------------------------------------------------------------------------------------------------------------------------------------------------------------------------------------------------------------------------------------------------------------------------------------------------------------------------------------------------------------------------------------------------------------------------------------------------------------|---------------------|
|                       |                 |                                                | health topics<br>relevant to MS.                   |             | Mean: cc: 11.4 ± 8.1 | (17.4)<br>Moderate<br>disability PA:<br>18 (26.1) FM+:<br>13 (18.6) CC:<br>10 (14.5)<br>Gait disability<br>PA: 17 (24.6)<br>FM+: 21 (30.0)<br>CC: 24 (34.8)<br>Early cane PA:<br>14 (20.3)<br>FM+17 (24.3)<br>CC: 14 (20.3)<br>Late cane PA: 7<br>(10.1) FM+10<br>(14.3) CC: 9<br>(13.0)<br><br>PDSS<br>number(%):<br>Mild disability<br>CC: 12 (17.4)<br>Moderate<br>disability CC:<br>10 (14.5)<br>Gait disability<br>CC: 24 (34.8)<br>Early cane CC:<br>14 (20.3)<br>Late cane CC: 9<br>(13.0) | Mean: 51.8<br>± 9.3 |
| Other                 |                 |                                                |                                                    |             |                      |                                                                                                                                                                                                                                                                                                                                                                                                                                                                                                   |                     |
| Home-care<br>activity | Huijgen<br>2008 | Randomized<br>controlled<br>multicentre trial, | Subjects in the<br>control group<br>received usual | 11 m / 13 f | Mean 15.1 ± 8.6.     | Unknown                                                                                                                                                                                                                                                                                                                                                                                                                                                                                           | Mean: 48<br>± 12.   |

|                                     |            |                                  |                                                            |                          |                                                |                                            |                                                |
|-------------------------------------|------------|----------------------------------|------------------------------------------------------------|--------------------------|------------------------------------------------|--------------------------------------------|------------------------------------------------|
| desk (H-CAD)                        |            | Italy, Spain & Belgium           | care and generic exercises prescribed by their physicians. | 7 m / 4 f                | Mean: $10.2 \pm 7.6$                           |                                            | Mean: $51 \pm 14$                              |
| Home Automated Telemanagement (HAT) | Jeong 2021 | Randomized controlled trial, USA | received periodic newsletters                              | 6 m / 23 f<br>6 m / 10 f | Mean: $21.4 \pm 13.5$<br>Mean: $19.8 \pm 13.7$ | Range: EDSS 5.5-7.5<br>Range: EDSS 5.5-7.5 | Mean: $57.8 \pm 11.9$<br>Mean: $56.0 \pm 12.8$ |

|                                 |                 |                                                                                           |                                       |                                                                      |                                                                                                                                                                       |                                       |                                                |
|---------------------------------|-----------------|-------------------------------------------------------------------------------------------|---------------------------------------|----------------------------------------------------------------------|-----------------------------------------------------------------------------------------------------------------------------------------------------------------------|---------------------------------------|------------------------------------------------|
| Nintendo Wii                    | Prosperini 2012 | Randomized crossover pilot study, Italy                                                   | wait-list control                     | Group A: 5 m / 13 f<br>Group B: 6 m / 12 f                           | Mean: $12.2 \pm 6.0$<br>Mean: $9.3 \pm 5.3$                                                                                                                           | Median: EDSS 3.0<br>Median: EDSS 3.5  | Mean: $35.3 \pm 8.6$<br>Mean: $37.1 \pm 8.8$   |
| Nintendo Wii                    | Thomas 2017     | Mixed methods pilot study used a single-centre wait-list randomised controlled design, UK | wait-list control                     | 1 m / 14 f<br>2 m / 13 f                                             | Number (5): <1 year: 1(7%), 1-5 years 7 (47%), 6-10 3(20), 11-15 2(13), >16 2(13)<br>Number (5): <1 year 2(13), 1-5 years: 4(27), 6-10: 1(7), 11-15 1(7%), >16: 4(27) | Unknown                               | Mean: $50.9 \pm 8.08$<br>Mean: $47.6 \pm 9.26$ |
| Nintendo Wii                    | Prosperini 2014 | Prospective study, Italy                                                                  | crossover AND healthy subjects        | 12 m / 18 f<br>6 m / 9 f                                             | Mean: $10.5 \pm 5.2$                                                                                                                                                  | Median EDSS 3.0                       | Mean: $35.6 \pm 7.7$ .<br>Mean: $34.8 \pm 5.6$ |
| Preloaded tablet                | Kim 2022        | Semi-structured interview guide, USA                                                      | no control but training at the clinic | TeleCAM 13<br>DirectCAM 7, TeleCAM 1 m / 12 f<br>DirectCAM 0 m / 7 f | Unknown                                                                                                                                                               | Median: PDSS Telecam: 1, directCAM: 2 | Mean: Telecam 51, Directcam: 47                |
| Home-care activity desk (H-CAD) | Hermens 2008    | Randomized controlled trial, Italy Spain & Belgium                                        | usual care                            | 55 (24 MS)<br>26 (11 MS)                                             | Unknown                                                                                                                                                               | Unknown                               | Mean: $48.1 \pm 11.6$<br>Mean: $51.9 \pm 14.5$ |
| Nintendo Wii                    | Plow 2014       | Qualitative study, USA                                                                    | N/A                                   | 7 m / 23 f                                                           | Mean: $9.0 \pm 6.8$                                                                                                                                                   | Number(%): PDSS Normal 8 (26.7)       | Mean: $43.2 \pm 9.3$                           |

|                 |           |                            |     |            |  |                     |                                                                                                                                                                                                            |                                                                                                                                                                |
|-----------------|-----------|----------------------------|-----|------------|--|---------------------|------------------------------------------------------------------------------------------------------------------------------------------------------------------------------------------------------------|----------------------------------------------------------------------------------------------------------------------------------------------------------------|
|                 |           |                            |     |            |  |                     |                                                                                                                                                                                                            | Mild disability 7<br>(23.3)<br><br>Moderate<br>disability 5<br>(16.7)<br><br>Gait disability 4<br>(13.3)<br><br>Early cane 5<br>(16.7)<br><br>Missing 1 (0.03) |
| Nintendo<br>Wii | Plow 2011 | Longitudinal study,<br>USA | N/A | 7 m / 23 f |  | Mean: $9.0 \pm 6.8$ | Number (%):<br>PDSS<br><br>Normal 8 (26.7)<br><br>Mild disability 7<br>(23.3)<br><br>Moderate<br>disability 5 (16.7)<br><br>Gait disability 4<br>(13.3)<br><br>Early cane 5 (16.7)<br><br>Missing 1 (0.03) | Mean: $43.2 \pm 9.3$                                                                                                                                           |
